# Supplementary material for: Metallic Material Selection and Prospective Surface Treatments for Proton Exchange Membrane Fuel Cell Bipolar Plates—A Review
Source: MDPI journal article supplement (doi:10.3390/ma14102682), 2021-05-20
Supplement: s1 [file s1]

*Supplementary Material*

# Metallic Material Selection and Prospective Surface Treatments for Proton Exchange Membrane Fuel Cell Bipolar Plates—A Review

Tereza Bohackova<sup>1</sup>, Jakub Ludvik <sup>\*</sup> and Milan Kouril

**Citation:** Bohackova, T.; Ludvik, J.; Kouril, M. Metallic Material Selection and Prospective Surface Treatments for Proton Exchange Membrane Fuel Cell Bipolar Plates—A Review. *Materials* **2021**, *14*, 2682. <https://doi.org/10.3390/ma14102682>

Department of Metals and Corrosion Engineering, University of Chemistry and Technology Prague, Technická 5 Prague 6, 166 28 Prague, Czech Republic; jamborot@vscht.cz (T.B.); kourilm@vscht.cz (M.K.)

<sup>\*</sup> Correspondence: ludvika@vscht.cz

Academic Editor: Jeong-Soo Sohn

Received: 30 March 2021

Accepted: 10 May 2021

Published: 20 May 2021

**Publisher's Note:** MDPI stays neutral with regard to jurisdictional claims in published maps and institutional affiliations.

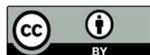

**Copyright:** © 2021 by the author. Licensee MDPI, Basel, Switzerland. This article is an open access article distributed under the terms and conditions of the Creative Commons Attribution (CC BY) license (<http://creativecommons.org/licenses/by/4.0/>).

**Table S1.** Comparison of corrosion resistance and contact resistance of various uncoated steels according to literature.

| Material                          | Electrolyte                                                                                                                                 | Temperature (°C) | icorr ( $\mu\text{A}/\text{cm}^2$ )                                      |                                       |                                         | ICR ( $\text{m}\Omega\text{cm}^2$ )<br>at 140 N/cm <sup>2</sup>                                                                                                | Citation |
|-----------------------------------|---------------------------------------------------------------------------------------------------------------------------------------------|------------------|--------------------------------------------------------------------------|---------------------------------------|-----------------------------------------|----------------------------------------------------------------------------------------------------------------------------------------------------------------|----------|
|                                   |                                                                                                                                             |                  | at E <sub>corr</sub>                                                     | at - 0.1 V/SCE                        | at 0.6 V/SCE                            |                                                                                                                                                                |          |
| 316L<br>321<br>347                | 85% H <sub>3</sub> PO <sub>4</sub>                                                                                                          | 30-120           | 3.16-130 $\mu\text{A}$<br>0.13-40 $\mu\text{A}$<br>0.30-79 $\mu\text{A}$ |                                       |                                         |                                                                                                                                                                | [163]    |
| 316L<br>430                       | 0,001 M H <sub>2</sub> SO <sub>4</sub> , 2 ppm F <sup>-</sup>                                                                               | 25               | 0.00249<br>0.00328                                                       |                                       |                                         |                                                                                                                                                                | [187]    |
| 316L                              | H <sub>2</sub> SO <sub>4</sub> , pH 1-6, 2 ppm HF                                                                                           | 80               |                                                                          |                                       | 17.91-2.24 <sup>D</sup>                 |                                                                                                                                                                | [34]     |
| 316L                              | 0,5 M H <sub>2</sub> SO <sub>4</sub>                                                                                                        | 70               | 2.43 <sup>K</sup> , 9.15 <sup>A</sup>                                    | 5 <sup>D</sup>                        | -0.7 <sup>D</sup>                       |                                                                                                                                                                | [22]     |
| 316L<br>316L elchem.<br>polishing | 1 M H <sub>2</sub> SO <sub>4</sub> , 2 ppm F <sup>-</sup>                                                                                   | 70               |                                                                          | 45 <sup>S</sup>                       |                                         | 229.2 <sup>at 150</sup><br>5.7-23.5 <sup>at 150</sup>                                                                                                          | [49]     |
| 316L                              | 0,001 M H <sub>2</sub> SO <sub>4</sub><br><br>10 <sup>-6</sup> M H <sub>2</sub> SO <sub>4</sub><br><br>0,5 M H <sub>2</sub> SO <sub>4</sub> | 70               |                                                                          |                                       | 2.85 <sup>S</sup> , at 1.4 V/SHE        | 67.6 vs. 149 <sup>at 137</sup> (af-<br>ter 1 V/SHE)<br>9.8 vs 38.1 <sup>at 137</sup> (after<br>1 V/SHE)<br>10.5 vs. 6.0 <sup>at 137</sup> (af-<br>ter 1 V/SHE) | [23]     |
| 316L                              | 0,5 M H <sub>2</sub> SO <sub>4</sub>                                                                                                        | 70               |                                                                          |                                       | 0.8 <sup>S</sup> , at 1 V/SHE           | 885 vs. 964 (after 1<br>V/SHE)                                                                                                                                 | [48]     |
| 316L                              | 1 M H <sub>2</sub> SO <sub>4</sub>                                                                                                          | 70               | 2 <sup>K</sup>                                                           |                                       | 0.2 <sup>S</sup>                        | 71 <sup>at 200</sup>                                                                                                                                           | [67]     |
| 316L                              | 1 M H <sub>2</sub> SO <sub>4</sub>                                                                                                          | 70               | 20.2 <sup>A</sup> , 1.9 <sup>K</sup>                                     | 153 <sup>D</sup> , 145 <sup>S</sup>   | 10 <sup>D</sup> , 1.1 <sup>S</sup>      | 66.4 <sup>at 274.4</sup>                                                                                                                                       | [69]     |
| 316L                              | 0.5 M H <sub>2</sub> SO <sub>4</sub> , 5 ppm HF                                                                                             | 70               |                                                                          |                                       |                                         | 45 <sup>at 200</sup>                                                                                                                                           | [105]    |
| 316L                              | 0.5 M H <sub>2</sub> SO <sub>4</sub> , 5 ppm HF                                                                                             | 70               | 47.93 <sup>A</sup> , 30.94 <sup>K</sup>                                  |                                       |                                         |                                                                                                                                                                | [36]     |
| 316L                              | 0.5 M H <sub>2</sub> SO <sub>4</sub> , 2 ppm HF                                                                                             | 70               | 8.09 <sup>A</sup> , 39.2 <sup>K</sup>                                    | 11.2 <sup>D</sup> , 3.59 <sup>S</sup> | 6.24E3 <sup>D</sup> , 4.58 <sup>S</sup> | 159.7 vs. 238.5 <sup>1</sup> and<br>265.3 <sup>2, at 150</sup>                                                                                                 | [97]     |
| 316L                              | H <sub>2</sub> SO <sub>4</sub> (pH=3, pH=6)                                                                                                 | 80               |                                                                          |                                       |                                         | 41 vs. 278 (po 1,4<br>V/SHE)                                                                                                                                   | [25]     |
| 316L                              | 0.5M H <sub>2</sub> SO <sub>4</sub> , 2 ppm HF                                                                                              | 80               |                                                                          | 20.8 <sup>D</sup>                     | 14.2 <sup>D</sup> , 0.6 <sup>S</sup>    |                                                                                                                                                                | [74]     |

| Material | Electrolyte                                                         | Temperature (°C) | icorr (µA/cm²)                        |                                  |                                                                                | ICR (mΩcm²)                                                  | Citation |
|----------|---------------------------------------------------------------------|------------------|---------------------------------------|----------------------------------|--------------------------------------------------------------------------------|--------------------------------------------------------------|----------|
|          |                                                                     |                  | at E <sub>corr</sub>                  | at - 0.1 V/SCE                   | at 0.6 V/SCE                                                                   |                                                              |          |
| 316L     | 0.5M H <sub>2</sub> SO <sub>4</sub> , 2 ppm HF                      | 25/80            | 0.141 /120                            | -9.6E-3/14.3 <sup>D</sup>        | 3.25/8.30 <sup>D</sup> ,<br>0.32/0.36 <sup>S</sup>                             | 156 vs. 240 <sup>2</sup>                                     | [188]    |
| 316L     | 0.5 M H <sub>2</sub> SO <sub>4</sub> , 5 ppm F <sup>-</sup>         | 25/70            | 0.32-3.16                             | 100-31.6 <sup>S</sup> , at 70 °C | 16/120 <sup>D,K</sup> a 290 <sup>D,A</sup> ,<br>1-0.32 <sup>S</sup> , at 70 °C |                                                              | [45]     |
| 316L     | 0.5 M H <sub>2</sub> SO <sub>4</sub> , 5 ppm HF                     | 80               |                                       |                                  | 11.26 <sup>D</sup> , 1.4 <sup>S</sup>                                          | 255.4 <sup>at 210</sup>                                      | [9]      |
| 316L     | 0.5 M H <sub>2</sub> SO <sub>4</sub> , 2 ppm HF                     | 80               | 50 <sup>K</sup> , 16.5 <sup>A</sup>   | > 1 <sup>S</sup>                 | 32.3 <sup>D</sup> , 50 <sup>S</sup>                                            | 350                                                          | [78]     |
| 316L     | 0.5 M H <sub>2</sub> SO <sub>4</sub> , 2 ppm HF                     | 80               |                                       |                                  | 11.26 <sup>D</sup> , 1.3 <sup>S</sup>                                          | 370.1                                                        | [81]     |
| 316L     | 0.1 M H <sub>2</sub> SO <sub>4</sub> , 2 ppm HF                     | 80               | 16.5 <sup>A</sup> , 35.3 <sup>K</sup> | 50 <sup>S</sup>                  | 41.4 <sup>D</sup> , 50 <sup>S</sup>                                            | 350 <sup>at 150</sup>                                        | [189]    |
| 316L     | 0.5 M H <sub>2</sub> SO <sub>4</sub> , 5 ppm HF                     | 70               |                                       |                                  |                                                                                |                                                              | [123]    |
| 316L     | 0.5 M H <sub>2</sub> SO <sub>4</sub> , 5 ppm HF                     | 70               |                                       | 5.6-10 <sup>S</sup>              | 5.1 <sup>S</sup>                                                               |                                                              | [61]     |
| 316L     | 0.5 M H <sub>2</sub> SO <sub>4</sub> , 5 ppm HF                     | 70               |                                       |                                  | 7.98 <sup>D</sup>                                                              |                                                              | [125]    |
| 316L     | 0.1 M H <sub>2</sub> SO <sub>4</sub>                                |                  | 2.92                                  |                                  |                                                                                |                                                              | [130]    |
| 316L     | 10 g Na <sub>2</sub> SO <sub>4</sub> (pH=3.5), 5 ppm F <sup>-</sup> | 60               |                                       | -0.13 <sup>S</sup>               | 0.013 <sup>S</sup>                                                             | 152                                                          | [86]     |
| 316      | 0.5 M H <sub>2</sub> SO <sub>4</sub> , 2 ppm HF                     |                  | 10.3                                  |                                  | 1.63 <sup>S</sup>                                                              | 158                                                          | [75]     |
| 316      | 0.5 M H <sub>2</sub> SO <sub>4</sub> , 2 ppm HF                     | 25               | 10.3                                  | -6.72 to -1.45 <sup>S</sup>      | 1.54 <sup>S</sup>                                                              | 700.5                                                        | [53]     |
| 316      | 0.01 M H <sub>2</sub> SO <sub>4</sub> (pH=2)                        | 80               | 5.66                                  |                                  |                                                                                |                                                              | [38]     |
| 304      | 0.5 M H <sub>2</sub> SO <sub>4</sub> , 2 ppm HF                     | 80               | 2.6                                   |                                  |                                                                                | 140 vs. 125 <sup>2</sup> , at 240                            | [41]     |
| 304      | 0.5 M H <sub>2</sub> SO <sub>4</sub> , 2 ppm HF                     | 80               |                                       |                                  |                                                                                | 100 vs. 150 <sup>1</sup> , 150 vs. 340 <sup>2</sup> , at 150 | [77]     |
| 304      | 3.5% NaCl                                                           | 25               | 7.41                                  |                                  |                                                                                | 158 vs. 560                                                  | [117]    |
| 304      | 0.5 M H <sub>2</sub> SO <sub>4</sub> , 5 ppm HF                     |                  |                                       |                                  | 20 <sup>S</sup>                                                                | 124.4 <sup>at 150</sup>                                      | [26]     |
| 304      | 0.5 M H <sub>2</sub> SO <sub>4</sub> , 2 ppm HF                     | 70               | 1.01                                  |                                  | 0.144 <sup>S</sup>                                                             | 415.32 vs. 593.45 <sup>2</sup> , at 150                      | [55]     |
| 304      | not specified                                                       |                  | 1.89E3                                | 1.87E4 <sup>D</sup>              | 1.41E5 <sup>D</sup>                                                            | 31.78 vs. 16.32                                              | [122]    |
| 304      | 0.1 M H <sub>2</sub> SO <sub>4</sub> (pH=3),                        |                  | 10                                    |                                  |                                                                                |                                                              | [80]     |
| 304      | 0.1 M H <sub>2</sub> SO <sub>4</sub> , 2 ppm HF                     | 80               |                                       | 122 <sup>D</sup>                 | 197 <sup>D</sup>                                                               |                                                              | [30]     |
| 304      | 0.05 M H <sub>2</sub> SO <sub>4</sub> , 2 ppm F <sup>-</sup>        | 70               |                                       | 21.2 <sup>D</sup>                | 13.45 <sup>D</sup>                                                             | 101 vs. 170.5 <sup>1</sup> and 278,3 <sup>2</sup>            | [71]     |

| Material             | Electrolyte                                                                                    | Temperature<br>(°C) | icorr<br>( $\mu\text{A}/\text{cm}^2$ ) |                                       |                                        | ICR ( $\text{m}\Omega\text{cm}^2$ )<br>at 140 N/cm <sup>2</sup> | Citation |
|----------------------|------------------------------------------------------------------------------------------------|---------------------|----------------------------------------|---------------------------------------|----------------------------------------|-----------------------------------------------------------------|----------|
|                      |                                                                                                |                     | at Ecorr                               | at - 0.1 V/SCE                        | at 0.6 V/SCE                           |                                                                 |          |
| 304                  | 1 M H <sub>2</sub> SO <sub>4</sub> , 2 ppm HF                                                  | 80                  |                                        | 34.7 <sup>D</sup> , 5.28 <sup>S</sup> | 46.9 <sup>D</sup> , 33.72 <sup>S</sup> | 430                                                             | [72]     |
| 304                  | 0.05 M H <sub>2</sub> SO <sub>4</sub> , 2 ppm HF                                               | 70                  | 21.2 <sup>A</sup> 13.45 <sup>K</sup>   |                                       |                                        | 101 vs. 170.5 <sup>1</sup> and<br>278,3 <sup>2</sup>            | [91]     |
| 304                  | 0.5 M H <sub>2</sub> SO <sub>4</sub> , 2 ppm HF                                                | 80                  | 78.37 <sup>A</sup> 319.6 <sup>K</sup>  |                                       |                                        | 101 vs 183.5 <sup>1</sup> and<br>285.3 <sup>2</sup>             | [88]     |
| 304                  | H <sub>2</sub> SO <sub>4</sub> (pH=5)                                                          | 70                  |                                        |                                       | 52.9 <sup>D</sup>                      | 98.99 vs. 160 <sup>2</sup> , at 220                             | [39]     |
| 304                  | 0.5 M H <sub>2</sub> SO <sub>4</sub> , 2 ppm HF                                                | 70                  |                                        |                                       |                                        | 116 <sup>at 135</sup>                                           | [47]     |
| Carbon steel         | H <sub>2</sub> SO <sub>4</sub> + 0.07 M Na <sub>2</sub> SO <sub>4</sub><br>(pH=4),<br>2 ppm HF | 50                  |                                        | 5.76 <sup>D</sup>                     | 2.51 <sup>D</sup>                      |                                                                 | [32]     |
| Carbon steel<br>1020 | 0.5 M H <sub>2</sub> SO <sub>4</sub>                                                           | 25                  | 634                                    |                                       |                                        | 403.8                                                           | [107]    |
| Mild steel           | 1 M H <sub>2</sub> SO <sub>4</sub>                                                             | 25                  | 5240                                   |                                       |                                        |                                                                 | [190]    |

Explanations to the table: A = anodic conditions (H<sub>2</sub> bubbled), K = cathodic conditions (air/oxygen purged), D = potentiodynamic test, S = potentiostatic test, 1 = after potentiostatic test at -0.1 V vs.SCE, 2 = after potentiostatic 0.6 V vs. SCE

**Table S2.** Comparison of corrosion resistance and contact resistance of surface treated steels.

| Material | Surface treatment                                                                      | Method/technique                | Electrolyte                              | Temperature (°C) | icorr ( $\mu\text{A}/\text{cm}^2$ )     |                                         |                                           | ICR ( $\text{m}\Omega\text{cm}^2$ )         | Citation |
|----------|----------------------------------------------------------------------------------------|---------------------------------|------------------------------------------|------------------|-----------------------------------------|-----------------------------------------|-------------------------------------------|---------------------------------------------|----------|
|          |                                                                                        |                                 |                                          |                  | at Ecorr                                | at - 0.1 V/SCE                          | at 0.6 V/SCE                              |                                             |          |
| 316L     | TiN                                                                                    | CFUBMSIP                        | 0.001 M $\text{H}_2\text{SO}_4$          | 70               |                                         |                                         | 25.4-0.08 <sup>S</sup> , at 1.4-0.8 V/SHE | 12.9 vs. 287 <sup>at 137</sup> (po 1 V/SHE) | [21]     |
| 316L     | TiN (0.4/1 $\mu\text{m}$ )<br>TiN+C (0.4+0.1 $\mu\text{m}$ )<br>Au (10 nm)             | CFUBMSIP                        | 0.5 M $\text{H}_2\text{SO}_4$            | 70               |                                         |                                         | 15/11 <sup>S</sup> , at 1 V/SHE           | 167/83 vs. 329/230 (po 1 V/SHE)             | [46]     |
|          |                                                                                        |                                 |                                          |                  |                                         |                                         | 0.02 <sup>S</sup> , at 1 V/SHE            | 3.4 vs. 4.5 (po 1 V/SHE)                    |          |
|          |                                                                                        |                                 |                                          |                  |                                         |                                         | 0.05 <sup>S</sup> , at 1 V/SHE            | 2.7 vs. 3.8 (po 1 V/SHE)                    |          |
| 316L     | AlN-TiN                                                                                | Plasma focus device             | 1 M $\text{H}_2\text{SO}_4$              | 70               | 2.8-9 <sup>K</sup>                      |                                         | 0.03-0.6 <sup>S</sup>                     | 6-20 <sup>at 200</sup>                      | [65]     |
| 316L     | TiN<br>CrN<br>TiAlN                                                                    | EBPVD                           | 1 M $\text{H}_2\text{SO}_4$              | 70               | 4.07 <sup>A</sup> , 31.5 <sup>K</sup>   | 10.4 <sup>D</sup> , 10E4 <sup>S</sup>   | 116 <sup>D</sup> , 18 <sup>S</sup>        | 35.0 <sup>at 274.4</sup>                    | [67]     |
|          |                                                                                        |                                 |                                          |                  | 1.41 <sup>A</sup> , 1.31 <sup>K</sup>   | 21 <sup>D</sup> , 10E4 <sup>S</sup>     | 52.4 <sup>D</sup> , 1.1 <sup>S</sup>      | 21.8 <sup>at 274.4</sup>                    |          |
|          |                                                                                        |                                 |                                          |                  | 317 <sup>A</sup> , 18.6 <sup>K</sup>    | 3.96E4 <sup>D</sup> , 10E4 <sup>S</sup> | 1.69E4 <sup>D</sup> , 10E3 <sup>S</sup>   | 7.5 <sup>at 274.4</sup>                     |          |
| 316L     | TiN (0.1-1 $\mu\text{m}$ )<br>CrN (0.1-1 $\mu\text{m}$ )<br>ZrN (0.1-1 $\mu\text{m}$ ) | PVD                             | 0.5 M $\text{H}_2\text{SO}_4$            | 70               |                                         |                                         |                                           | 57-12 vs. 43-314                            | [87]     |
|          |                                                                                        |                                 |                                          |                  |                                         |                                         |                                           | 339-1583 vs. 347-2121                       |          |
|          |                                                                                        |                                 |                                          |                  |                                         |                                         |                                           | 1364-3788 vs. 1646-3612                     |          |
| 316L     | CrN+CrC                                                                                | Chromizing deposition (900 °C)  | 0.5 M $\text{H}_2\text{SO}_4$ , 5 ppm HF | 70               |                                         | 6.5 <sup>S</sup>                        | 7.5E-2 <sup>D</sup>                       | 13 <sup>at 200</sup>                        | [103]    |
|          |                                                                                        | Chromizing deposition (1100 °C) |                                          |                  |                                         | 32 <sup>S</sup>                         | 0.35 <sup>D</sup>                         |                                             |          |
| 316L     | CrN                                                                                    | CFUBMSIP                        | 0.5 M $\text{H}_2\text{SO}_4$ , 5 ppm HF | 70               | 2.231 <sup>A</sup> , 1.225 <sup>K</sup> |                                         |                                           |                                             | [34]     |

| Material | Surface treatment                        | Method/technique                           | Electrolyte                                                 | Temperature (°C) | icorr (µA/cm²)                                        |                                                                                         |                                                                                | ICR (mΩcm²)                                            | Citation |
|----------|------------------------------------------|--------------------------------------------|-------------------------------------------------------------|------------------|-------------------------------------------------------|-----------------------------------------------------------------------------------------|--------------------------------------------------------------------------------|--------------------------------------------------------|----------|
|          |                                          |                                            |                                                             |                  | at Ecorr                                              | at - 0.1 V/SCE                                                                          | at 0.6 V/SCE                                                                   |                                                        |          |
|          | CrTiN (1.09-6.79 at.% Ti)                |                                            |                                                             |                  | 0.535-0.006.5 <sup>A</sup><br>0.87-0.074 <sup>K</sup> |                                                                                         |                                                                                | 4,57 vs. 5.8 <sup>1</sup> a 6.53 <sup>2</sup> , at 150 |          |
| 316L     | Cr-N<br><br>Cr-Al-N (1.86-21.34 at.% Al) | CFUBMSIP                                   | 0.5 M H <sub>2</sub> SO <sub>4</sub> , 5 ppm HF             | 70               | 0.261                                                 | -0.13 <sup>D</sup> , -0.29 <sup>S</sup>                                                 | 2.90 <sup>D</sup> , 0.1 <sup>S</sup>                                           | 5.1                                                    | [99]     |
| 316L     | ZrN                                      | Double glow discharge                      | 0.5 M H <sub>2</sub> SO <sub>4</sub> , 2 ppm HF             | 70               | 0.081 <sup>A</sup> , 0.142 <sup>K</sup>               | 0.847 <sup>D</sup> , -1.51 <sup>S</sup>                                                 | 0.743 <sup>D</sup>                                                             | 7.4 vs. 8.5 <sup>1</sup> a 9.2 <sup>2</sup> , at 150   | [95]     |
| 316L     | TaN <sub>x</sub>                         | HPPMS (parameters)                         | H <sub>2</sub> SO <sub>4</sub> (pH=3,pH=6)                  | 80               |                                                       | < 1 (pH 3) <sup>D</sup> , -1 (pH 6) <sup>D</sup> , -1(pH 3) <sup>S</sup> , at 1.4 V/SHE |                                                                                |                                                        | [23]     |
| 316L     | Ta                                       | ICP assisted reactive magnetron sputtering | 0.5 M H <sub>2</sub> SO <sub>4</sub> , 2 ppm HF             | 80               |                                                       | 0.072 <sup>D</sup> , -0.06 <sup>S</sup>                                                 | 6.15 <sup>D</sup> , 0.2 <sup>S</sup>                                           |                                                        | [72]     |
|          | TaN                                      |                                            |                                                             |                  |                                                       | 0.017-0.12 <sup>D</sup> , -0.06 <sup>S</sup>                                            | 0.33-1.06 <sup>D</sup> , 0.2 <sup>S</sup>                                      | 11-150 at 150                                          |          |
| 316L     | Ta/TaN                                   | DC reactive magnetron sputtering           | 0.5 M H <sub>2</sub> SO <sub>4</sub> , 2 ppm HF             | 25/80            | 0.067/0.028                                           | -0.478/-0.182 <sup>D</sup>                                                              | 1.20/1.53 <sup>D</sup> , 0.21/0.07 <sup>S</sup>                                | 12 vs. 13 <sup>2</sup>                                 | [186]    |
| 316L     | Cr-C                                     | Unknown                                    | 0.5 M H <sub>2</sub> SO <sub>4</sub> , 5 mg/l HF            | 80               | 0.04                                                  |                                                                                         |                                                                                |                                                        | [27]     |
| 316L     | CrC (ratio Cr:C)                         | CFUBMSIP                                   | 0.5 M H <sub>2</sub> SO <sub>4</sub> , 5 ppm HF             | 70               |                                                       | 10E-5.4 <sup>S</sup> (Cr <sub>0.75</sub> C <sub>5</sub> )                               | 1.046-184 <sup>D</sup> , 10E-6.5 <sup>S</sup>                                  | 1.4-7.5                                                | [107]    |
| 316L     | CrC (composition)                        | PBAIP                                      | 0.5 M H <sub>2</sub> SO <sub>4</sub> , 5 ppm F <sup>-</sup> | 25/70            | 0.1-1                                                 | 0.32-0.1 <sup>S</sup> , at 70 °C                                                        | 0.09/0.23 <sup>D,K</sup> a 3 <sup>D,A</sup> , 0.1-0.03 <sup>S</sup> , at 70 °C | 2.8 vs. 6.2 <sup>1</sup> a 8.7 <sup>2</sup> , at 120   | [43]     |

| Material | Surface treatment    | Method/technique             | Electrolyte                                | Temperature (°C) | icorr ( $\mu\text{A}/\text{cm}^2$ )   |                        |                                                               | ICR ( $\text{m}\Omega\text{cm}^2$ )                     | Citation |
|----------|----------------------|------------------------------|--------------------------------------------|------------------|---------------------------------------|------------------------|---------------------------------------------------------------|---------------------------------------------------------|----------|
|          |                      |                              |                                            |                  | at Ecorr                              | at - 0.1 V/SCE         | at 0.6 V/SCE                                                  |                                                         |          |
| 316L     | C                    | CFUBMSIP                     | 0.5 M $\text{H}_2\text{SO}_4$ , 5 ppm HF   | 80               |                                       |                        | 1.85 <sup>D</sup> , 2.4 <sup>S</sup>                          | 5.2 vs. 18.4 <sup>1,2</sup> at 210                      | [9]      |
| 316L     | CrN                  | CFUBMSIP                     | 0.5 M $\text{H}_2\text{SO}_4$ , 2 ppm HF   | 80               |                                       |                        | 2.14 <sup>D</sup> , 0.25 <sup>S</sup>                         |                                                         | [79]     |
|          | C/CrN (thickness)    |                              |                                            |                  |                                       |                        | 0.5-1.06 <sup>D</sup> , 90-20 <sup>S</sup> pA/cm <sup>2</sup> | 2.6-2.9                                                 |          |
| 316L     | C                    | Beaming accelerated C60 ions | 0.5 M $\text{H}_2\text{SO}_4$ , 2 ppm HF   | 80               | 0.5 <sup>K</sup> , 0.05 <sup>A</sup>  | 0.5 <sup>S</sup>       | 0.23 <sup>D</sup> , 0.1 <sup>S</sup>                          | 12 vs. 13 <sup>1,2</sup>                                | [76]     |
| 316L     | C on Ti-layer        | CFUBMSIP                     | $\text{H}_2\text{SO}_4$ (pH=3), 0.1 ppm HF | 80               | 0.35                                  |                        | 0.31 <sup>S</sup> , at 1.1 V/SHE                              | 14.5/23.4 (po 1.1/1.6 V/SHE)                            | [22]     |
|          | C on Cr-layer        |                              |                                            |                  | 0.76                                  |                        | 12.8 <sup>S</sup> , at 1.1 V/SHE                              | 7.6/34 (po 1.1/1.6 V/SHE)                               |          |
|          | C on Nb-layer        |                              |                                            |                  | 0.54                                  |                        | 0.1 <sup>S</sup> , at 1.1 V/SHE                               | 17.8/26.1 (po 1.1/1.6 V/SHE)                            |          |
| 316L     | CrN                  | CAIP                         | 0.1 M $\text{H}_2\text{SO}_4$ , 2 ppm HF   | 80               | 0.09 <sup>A</sup> , 0.31 <sup>K</sup> | -0.36 <sup>S</sup>     | 41.4 <sup>D</sup>                                             | 23 vs. 25 <sup>1</sup> a 32 <sup>2</sup> , at 150       | [187]    |
|          | C/CrN                |                              |                                            |                  | 0.12 <sup>A</sup> , 0.07 <sup>K</sup> | -0.18 <sup>S</sup>     | 1.02 <sup>D</sup> , 0.3 <sup>S</sup>                          | 12 vs. aprox. 12 <sup>1,2</sup> at 150                  |          |
| 316L     | C-Cr-N (composition) | CFUBMSIP                     | 0.5 M $\text{H}_2\text{SO}_4$ , 5 ppm HF   | 70               |                                       | 1.26-0.16 <sup>S</sup> | 0.31-3.72, 0.13-0.016 <sup>S</sup>                            | 2.11-8.23                                               | [121]    |
| 316L     | CrN/CrNC/C           | CFUBMSIP                     | 0.5 M $\text{H}_2\text{SO}_4$ , 5 ppm HF   | 70               |                                       | 0.32 <sup>S</sup>      | 0.61 <sup>D</sup> , 0.025 <sup>S</sup>                        | 2.64                                                    | [59]     |
|          | CrN                  |                              |                                            |                  |                                       |                        | 9.63 <sup>D</sup>                                             | 15.2                                                    |          |
|          | CrN/CrNC             |                              |                                            |                  |                                       |                        | 4.47 <sup>D</sup>                                             |                                                         |          |
| 316L     | C                    | CFUBMSIP                     | 0.5 M $\text{H}_2\text{SO}_4$ , 5 ppm HF   | 70               |                                       |                        | 3.56 <sup>D</sup>                                             | 5.4 at 150                                              | [123]    |
|          | Zr-C/C               |                              |                                            |                  |                                       | -7 <sup>S</sup>        | 0.49 <sup>D</sup> , 0.06 <sup>S</sup>                         | 3.63 vs. 3.82 <sup>1</sup> a 3.92 <sup>2</sup> , at 150 |          |

| Material | Surface treatment     | Method/technique                         | Electrolyte                                                         | Temperature (°C) | icorr ( $\mu\text{A}/\text{cm}^2$ ) |                                     |                                      | ICR ( $\text{m}\Omega\text{cm}^2$ )                      | Citation |
|----------|-----------------------|------------------------------------------|---------------------------------------------------------------------|------------------|-------------------------------------|-------------------------------------|--------------------------------------|----------------------------------------------------------|----------|
|          |                       |                                          |                                                                     |                  | at Ecorr                            | at - 0.1 V/SCE                      | at 0.6 V/SCE                         | at 140 N/cm <sup>2</sup>                                 |          |
| 316L     | Poly-p-phenyldiamine  | Electrodeposition                        | 0.1 M H <sub>2</sub> SO <sub>4</sub>                                |                  | 0.78-1.66                           |                                     |                                      |                                                          | [128]    |
| 316L     | Ag                    | Unknown                                  | 0.5 M H <sub>2</sub> SO <sub>4</sub> , 2 ppm F <sup>-</sup>         | 80               |                                     | 296 <sup>D</sup> , 30 <sup>S</sup>  | 593 <sup>D</sup> , 1920 <sup>S</sup> | 5.64 <sup>at 120</sup>                                   | [31]     |
|          | Ag - passivation      |                                          |                                                                     |                  |                                     | 2.27 <sup>D</sup> , 23 <sup>S</sup> | 44.4 <sup>D</sup> , 670 <sup>S</sup> | 6.09 <sup>at 120</sup>                                   |          |
| 316L     | Ce enriched           |                                          | 10 g Na <sub>2</sub> SO <sub>4</sub> (pH=3.5), 5 ppm F <sup>-</sup> | 60               |                                     | -0.15 <sup>S</sup>                  | 0.015 <sup>S</sup>                   | 33                                                       | [84]     |
| 316      | Nb+N                  | Active screen plasma surface co-alloying | 0.5 M H <sub>2</sub> SO <sub>4</sub> , 2 ppm HF                     |                  | 3.2-20.8                            |                                     | 2.21 <sup>S</sup>                    | 8.9-9.4                                                  | [73]     |
| 316      | Pt+N                  | Active screen plasma co-alloying         | 0.5 M H <sub>2</sub> SO <sub>4</sub> , 2 ppm HF                     | 25               | 24.5-55.7                           | -26.2 to -14.5 <sup>S</sup>         | 0.034 <sup>S</sup>                   | 6.3-6.9                                                  | [51]     |
| 304      | TiN                   | PBAIP                                    | 0.5 M H <sub>2</sub> SO <sub>4</sub> , 2 ppm HF                     | 80               | 1.45E-2                             |                                     |                                      | < 20 vs. 25 <sup>2</sup> , at 240                        | [39]     |
|          | Ti <sub>2</sub> N/TiN |                                          |                                                                     |                  | 1.31E-2                             |                                     |                                      | < 20 vs. 30 <sup>2</sup> , at 240                        |          |
| 304      | C                     | Plasma assisted CVD                      | 0.5 M H <sub>2</sub> SO <sub>4</sub> , 2 ppm HF                     | 80               |                                     |                                     |                                      | 14 vs. 16 <sup>1</sup> a 21 vs. 18 <sup>2</sup> , at 150 | [75]     |
| 304      | graphen Ni + graphen  | CVD Electroplating + CVD                 | 3.5% NaCl                                                           | 25               | 35.2                                |                                     |                                      |                                                          | [115]    |
|          |                       |                                          |                                                                     |                  | 0.163                               |                                     |                                      | 30 vs. 36                                                |          |
| 304      | C                     | DCMP                                     | 0.5 M H <sub>2</sub> SO <sub>4</sub> , 5 ppm HF                     |                  |                                     |                                     | 20 <sup>S</sup>                      |                                                          | [24]     |
|          | Cr/C                  |                                          |                                                                     |                  |                                     |                                     | < 0 <sup>S</sup>                     | 16.65 <sup>at 150</sup>                                  |          |



| Material | Surface treatment | Method/technique                   | Electrolyte                                           | Temperature (°C) | icorr ( $\mu\text{A}/\text{cm}^2$ ) |                                               |                                              | ICR ( $\text{m}\Omega\text{cm}^2$ )               | Citation |
|----------|-------------------|------------------------------------|-------------------------------------------------------|------------------|-------------------------------------|-----------------------------------------------|----------------------------------------------|---------------------------------------------------|----------|
|          |                   |                                    |                                                       |                  | at Ecorr                            | at - 0.1 V/SCE                                | at 0.6 V/SCE                                 |                                                   |          |
| 304      | Cr-C (time)       | Electroplating                     | 0.5 M $\text{H}_2\text{SO}_4$ , 2 ppm HF              | 70               | 0.27-0.073                          |                                               | 1.5E-4 <sup>S</sup>                          | 19.52 vs. 26.2 <sup>2</sup> , at 150              | [53]     |
| 304      | C-Ni (1 layer)    | Plasma blow-pipe with internal arc | Unknown                                               |                  | 0.45                                | 1.11 <sup>D</sup>                             | 3.43 <sup>D</sup>                            | 11.81 vs. 8.12                                    | [120]    |
|          | C-Ni (2 layers)   |                                    |                                                       |                  | 1.52E-2                             | 2.37E-2 <sup>D</sup>                          | 7.76E-2 <sup>D</sup>                         | 5.81 vs. 5.60                                     |          |
| 304      | PPY               | Electrodeposition                  | 0.1 M $\text{H}_2\text{SO}_4$ (pH=3),                 |                  | 1                                   |                                               |                                              |                                                   | [78]     |
|          | PANI              |                                    |                                                       |                  | 0.1                                 |                                               |                                              |                                                   |          |
| 304      | PPY/PANI          | Electrodeposition                  | 0.1 M $\text{H}_2\text{SO}_4$ , 2 ppm HF              | 80               |                                     | 206 <sup>D</sup>                              | 161 <sup>D</sup>                             |                                                   | [28]     |
| 304      | NbN               | Plasma surface diffusion alloying  | 0.05 M $\text{H}_2\text{SO}_4$ , 2 ppm F <sup>-</sup> | 70               |                                     | 0.13 <sup>D</sup> , -0.08 až 0.4 <sup>S</sup> | 0.071 <sup>D</sup> , 0.2-0.8 <sup>S</sup>    | 9.26 vs. 18.08 <sup>1</sup> a 19.14 <sup>2</sup>  | [69]     |
| 304      | NbN               | TRD (temp.)                        | 1 M $\text{H}_2\text{SO}_4$ , 2 ppm HF                | 80               |                                     | 114-780 <sup>D</sup> , 2240-3340 <sup>S</sup> | 70-265 <sup>D</sup> , 848-1037 <sup>S</sup>  | 30-40                                             | [33]     |
|          | Moření + NbN      |                                    |                                                       |                  |                                     | 10.2-12 <sup>D</sup> , 0.57-4.67 <sup>S</sup> | 3.2-5.5 <sup>D</sup> , 0.75-4.5 <sup>S</sup> | 34-66                                             |          |
| 304      | MoN               | Plasma surface diffusion alloying  | 0.05 M $\text{H}_2\text{SO}_4$ , 2 ppm HF             | 70               | 4.79 <sup>A</sup>                   | 3.83 <sup>K</sup>                             |                                              | 27.26 vs. 34.25 <sup>1</sup> a 43.26 <sup>2</sup> | [89]     |
| 304      | NbC               | Plasma surface diffusion alloying  | 0.5 M $\text{H}_2\text{SO}_4$ , 2 ppm HF              | 80               | 0.06 <sup>A</sup>                   | 0.05 <sup>K</sup>                             |                                              | 8.5 vs 8.8 <sup>1</sup> a 9.0 <sup>2</sup>        | [86]     |
| 304      | Ni-Mo)            | Electrodeposition                  | $\text{H}_2\text{SO}_4$ (pH=5)                        | 70               |                                     |                                               | 5.8-12.1 <sup>D</sup>                        | 12.77 vs. 92.28 <sup>2</sup> , at 220             | [37]     |
|          | No-Mo-P           |                                    |                                                       |                  |                                     |                                               | 30.1-52.9 <sup>D</sup>                       | 11.36 vs. 47.32 <sup>2</sup> , at 220             |          |

| Material     | Surface treatment | Method/technique                       | Electrolyte                                                                              | Temperature (°C) | icorr (μA/cm²) |                   |                               | ICR (mΩcm²)                                 | Citation |
|--------------|-------------------|----------------------------------------|------------------------------------------------------------------------------------------|------------------|----------------|-------------------|-------------------------------|---------------------------------------------|----------|
|              |                   |                                        |                                                                                          |                  | at Ecorr       | at - 0.1 V/SCE    | at 0.6 V/SCE                  | at 140 N/cm²                                |          |
| Carbon steel | Ni-P              | Electroless plating                    | H <sub>2</sub> SO <sub>4</sub> + 0.07 M Na <sub>2</sub> SO <sub>4</sub> (pH=4), 2 ppm HF | 50               |                | 1.45 <sup>D</sup> | 6.63 <sup>D</sup>             | 16.2                                        | [30]     |
|              | CrN               | CFUBMSIP                               |                                                                                          |                  |                | 2.99 <sup>D</sup> | 4.81 <sup>D</sup>             | 2.2                                         |          |
|              | Ni-P/CrN          | Electroless plating + CFUBMSIP         |                                                                                          |                  |                | 0.68 <sup>D</sup> | 0.13 <sup>D</sup>             | 3.3 vs. 3.9 <sup>1</sup> a 4.6 <sup>2</sup> |          |
| 1020         | CrN + CrC         | Pack chromi-zation                     | 0.5 M H <sub>2</sub> SO <sub>4</sub>                                                     | 25               | 1.24           |                   |                               | 39.0                                        | [105]    |
|              |                   | EDM + pack chromization (2 A/10 A)     |                                                                                          |                  | 0.058/0.576    |                   |                               | 11.8/17.7                                   |          |
| 1045         | CrN + CrC         | Pack chromi-zation (2 h/4 h)           | 0.5 M H <sub>2</sub> SO <sub>4</sub>                                                     | 25               | 1.24/0.932     |                   |                               | 14.9 (pro 2 h) <sup>at 150</sup>            | [104]    |
|              |                   | EDM + pack chromization (2 h/4 h)      |                                                                                          |                  | 0.221/0.0286   |                   | 0.122 (pro 2 h)               | 9.8 (pro 2 h) <sup>at 150</sup>             |          |
|              |                   | Rolling + pack chromization (2 h/ 4 h) |                                                                                          |                  | 0.0313/0.03    | 87.5 (pro 2 h)    | 0.0756 <sup>s</sup> (pro 2 h) | 5.9 (pro 2 h) <sup>at 150</sup>             |          |
| mild steel   | ZnAl (25/75)      | Plasma spray-ing                       | 1 M H <sub>2</sub> SO <sub>4</sub>                                                       | 25               | 6.21           |                   |                               |                                             | [188]    |
|              | ZnAl (50/50)      |                                        |                                                                                          |                  | 336            |                   |                               |                                             |          |
|              | ZnAl (75/25)      |                                        |                                                                                          |                  | 394            |                   |                               |                                             |          |

Explanation to the table: A = anodic conditions (H<sub>2</sub> bubbled), K = cathodic conditions (air/oxygen bubbled), D = potentiodynamic test, S = potentiostatic test, 1 = after potentiostatic test at -0.1 V/SCE, 2 = after potentiostatic test at 0.6 V/SCE

| Material                                                                                                                                                                                                                                                                                                                                                                                                                                                                                                     | Surface treatment | Method/technique | Electrolyte | Temperature (°C) | icorr (μA/cm²)       |                |              | ICR (mΩcm²)  | Citation |
|--------------------------------------------------------------------------------------------------------------------------------------------------------------------------------------------------------------------------------------------------------------------------------------------------------------------------------------------------------------------------------------------------------------------------------------------------------------------------------------------------------------|-------------------|------------------|-------------|------------------|----------------------|----------------|--------------|--------------|----------|
|                                                                                                                                                                                                                                                                                                                                                                                                                                                                                                              |                   |                  |             |                  | at E <sub>corr</sub> | at - 0.1 V/SCE | at 0.6 V/SCE | at 140 N/cm² |          |
| Shortcuts for methods: CFUBMSIP = Closed Field Unbalanced Magnetron Sputter Ion Plating, EBPVD = Electron Beam Physical Vapour Deposition, PVD = Physical Vapour Deposition, HPPMS = High Power Pulse Magnetron Sputtering, ICP = Inductively Coupled Plasma, DC = Direct Current, PBAIP = Pulsed Bias Arc Ion Plating, CAIP = Cathode Arc Ion Plating, CVD = Chemical Vapour Deposition, DCMP = Direct Current Magnetron Sputtering, TRD = Thermo-reactive Deposition, EDM = Electrical Discharge Machining |                   |                  |             |                  |                      |                |              |              |          |

**Table S3.** Comparison of corrosion resistance and contact resistance of metal materials other than steel.

| Material | Surface treat-<br>ment | Method/technique    | Electrolyte                            | Temp.<br>(°C) | icorr (μA/cm²)                                       |                    |                         | ICR (mΩcm²)<br>at 140 N/cm² | Citat. |
|----------|------------------------|---------------------|----------------------------------------|---------------|------------------------------------------------------|--------------------|-------------------------|-----------------------------|--------|
|          |                        |                     |                                        |               | at Ecorr                                             | at - 0.1 V/SCE     | at 0.6 V/SCE            |                             |        |
| Al 5083  | -                      |                     | 0.5 M H₂SO₄, 2<br>ppm HF               | 70            | 1915 <sup>A</sup>                                    | 1038 <sup>K</sup>  |                         | 34 <sup>at 135</sup>        | [45]   |
|          | CrN (3-5 μm)           | PVD                 |                                        |               | 18.85-57.42 <sup>A</sup><br>129.2-79.12 <sup>K</sup> |                    | 6-8.5 <sup>at 135</sup> |                             |        |
| Al 5083  | -                      |                     | 0.5 M H₂SO₄, 2<br>ppm HF               | 70            | 1915 <sup>A</sup>                                    | 1038 <sup>K</sup>  |                         |                             | [57]   |
|          | CrN                    | CAE-PVD             |                                        |               | 25.02 <sup>A,K</sup>                                 |                    |                         |                             |        |
|          | ZrN/CrN                |                     |                                        |               | 73.24 <sup>A</sup>                                   | 918.9 <sup>K</sup> |                         |                             |        |
| AA 5052  | -                      |                     | 0.001 M H₂SO₄,<br>0.1 ppm NaF,<br>pH=3 |               | 268.8                                                |                    | 200 <sup>D</sup>        | 61.58 <sup>at 150</sup>     | [154]  |
|          | TiN                    | CFUBMSIP            |                                        |               | 34.4                                                 |                    | > 100 <sup>D</sup>      | 20.08 <sup>at 150</sup>     |        |
|          | CrN                    |                     |                                        |               | 36.8                                                 |                    | > 100 <sup>D</sup>      | 7.76 <sup>at 150</sup>      |        |
|          | C                      |                     |                                        |               | 4.6 <sup>A</sup>                                     | 46.7 <sup>K</sup>  |                         | 6.39 <sup>at 150</sup>      |        |
|          | C/TiN                  |                     |                                        |               | 0.4 <sup>A</sup>                                     | 36.0 <sup>K</sup>  |                         |                             |        |
|          | C/CrN                  |                     |                                        |               | 0.5 <sup>A</sup>                                     | 40.7 <sup>K</sup>  | aprox 10 <sup>D</sup>   | 4.08 <sup>at 150</sup>      |        |
| Al 5052  | -                      |                     | 0.5 M H₂SO₄, 2<br>ppm HF               | 25            | 214                                                  | 110 <sup>D</sup>   | 5030 <sup>D</sup>       |                             | [189]  |
|          | Ni-P                   | Electroless plating |                                        |               | 9.37                                                 | 56.2 <sup>D</sup>  | 6560 <sup>D</sup>       |                             |        |
|          | Ni-P-PTFE              | Electroless plating |                                        |               | 28.1                                                 | 177 <sup>D</sup>   | 6010 <sup>D</sup>       |                             |        |
|          | Ni-P/Au                |                     |                                        |               | 4.33                                                 | 0.734 <sup>D</sup> | 163 <sup>D</sup>        | 4                           |        |
|          | Ni-P-PTFE/Au-PTFE      |                     |                                        |               | 7.58                                                 | 3.93 <sup>D</sup>  | 461 <sup>D</sup>        | 6                           |        |
| Al 6061  | -                      |                     | 0.5 M H₂SO₄, 2<br>ppm HF               |               | 416                                                  |                    |                         | 184.5                       | [56]   |
|          | CrC                    | Thermal spraying    |                                        |               | 65                                                   |                    |                         | 15.5                        |        |
| Al       | -                      |                     | 0.5 M H₂SO₄, 2<br>ppm HF               | 25            | 74.69                                                |                    |                         | 257.25                      | [158]  |
| Al 6061  | -                      |                     |                                        |               | 55.14                                                |                    |                         | 128.45                      |        |

| Material | Surface treatment       | Method/technique                                  | Electrolyte                                       | Temp. (°C) | icorr ( $\mu\text{A}/\text{cm}^2$ )   |                                            |                                       | ICR ( $\text{m}\Omega\text{cm}^2$ )<br>at 140 N/cm <sup>2</sup> | Citat. |
|----------|-------------------------|---------------------------------------------------|---------------------------------------------------|------------|---------------------------------------|--------------------------------------------|---------------------------------------|-----------------------------------------------------------------|--------|
|          |                         |                                                   |                                                   |            | at E <sub>corr</sub>                  | at - 0.1 V/SCE                             | at 0.6 V/SCE                          |                                                                 |        |
| Al 3004  | -                       | Electroless plating                               |                                                   | 25/75      | 44.9                                  |                                            |                                       | 311.25                                                          |        |
| Al 1050  | -                       |                                                   |                                                   |            | 36.38                                 |                                            |                                       | 361.75                                                          |        |
| Al       | Ni-P                    |                                                   |                                                   |            | 7.59/703.3                            | 5.81E-5/1.97E-1.56E-2/3.59E-3 <sup>s</sup> |                                       | 83.75                                                           |        |
| Al 6061  | Ni-P                    |                                                   |                                                   |            | 11.19/3.25E3                          | 9.66E-5/7.13E-1.96E-2/1.18E-2 <sup>s</sup> |                                       | 84.85                                                           |        |
| Al 3004  | Ni-P                    |                                                   |                                                   |            | 22.39/3.03E3                          | 1.48E-4/4.47E-1.70E-2/6.52E-3 <sup>s</sup> |                                       | 56.75                                                           |        |
| Al 1050  | Ni-P                    |                                                   |                                                   |            | 0.814/576.3                           | 4.37E-6/1.95E-5.95E-5/4.13E-3 <sup>s</sup> |                                       | 39.05                                                           |        |
| Al 6061  | -                       | Zincating + electroless plating                   | 0.5 M H <sub>2</sub> SO <sub>4</sub>              | 25         | 53.5                                  |                                            |                                       |                                                                 | [159]  |
|          | Ni-P (1x)               |                                                   |                                                   |            | 10                                    |                                            |                                       |                                                                 |        |
|          | Ni-P (2x)               |                                                   |                                                   |            | 10                                    |                                            |                                       |                                                                 |        |
|          | Ni-P (3x)               |                                                   |                                                   |            | 4.4                                   |                                            |                                       |                                                                 |        |
| Al 5251  | -                       | Zincating + electroless deposition/electroplating | 0.5 M H <sub>2</sub> SO <sub>4</sub> , 2 ppm HF   | 25         | 78                                    |                                            | 640 <sup>s</sup>                      |                                                                 | [38]   |
|          | Ni-P                    |                                                   |                                                   |            | 18.5/1.2                              | 93.4/0.,113 <sup>D</sup>                   | 1.55E4-4.18 <sup>D</sup>              |                                                                 |        |
|          | Ni-Co-P (Ni:Co 5:1/1:1) |                                                   |                                                   |            | 0.732/0.644                           | 1.32/1.20 <sup>D</sup>                     | 31/20.9 <sup>D</sup>                  |                                                                 |        |
|          | Ni-Co-P (Ni:Co 1:1)     |                                                   |                                                   |            | 14.5/8.96                             | 121/32.1 <sup>D</sup>                      | 7110/640 <sup>D</sup>                 |                                                                 |        |
| A356     | -                       | DCMS                                              | 0.5 M H <sub>2</sub> SO <sub>4</sub> , 2 ppm HF   |            |                                       | 102.94 <sup>D</sup>                        | 842.33 <sup>D</sup>                   |                                                                 | [19]   |
| Al 7075  | TiN/CrN                 |                                                   |                                                   |            |                                       | 4.6 <sup>D</sup> , 130 <sup>s</sup>        | 29.03 <sup>D</sup> , 145 <sup>s</sup> |                                                                 |        |
|          | -                       |                                                   |                                                   |            |                                       | 176.77 <sup>D</sup>                        | 1265.7 <sup>D</sup>                   |                                                                 |        |
|          | TiN/CrN                 | DCMS                                              |                                                   |            |                                       | 60.29 <sup>D</sup>                         | 89.68 <sup>D</sup>                    |                                                                 |        |
| GW83     | -                       | Electroless deposition                            | 1 mM H <sub>2</sub> SO <sub>4</sub> , 0.1 ppm NaF | 70         | 74.2 <sup>A</sup> , 66.5 <sup>K</sup> |                                            |                                       | 196.5 vs. 354.1 <sup>2</sup> , at 150                           | [58]   |
|          | Ni                      |                                                   |                                                   |            | 47.8 <sup>A</sup> , 5.6 <sup>K</sup>  |                                            |                                       | 126.4 vs. 158.2 <sup>1</sup> a<br>170.4 <sup>2</sup> , at 150   |        |

| Material        | Surface treatment | Method/technique                  | Electrolyte                                                                                       | Temp.<br>(°C) | icorr (μA/cm²)                              |                   |                   | ICR (mΩcm²)<br>at 140 N/cm²                 | Citat.                                     |       |
|-----------------|-------------------|-----------------------------------|---------------------------------------------------------------------------------------------------|---------------|---------------------------------------------|-------------------|-------------------|---------------------------------------------|--------------------------------------------|-------|
|                 |                   |                                   |                                                                                                   |               | at E <sub>corr</sub>                        | at - 0.1 V/SCE    | at 0.6 V/SCE      |                                             |                                            |       |
|                 | C                 | CFUBMSIP                          |                                                                                                   |               | 40.1 <sup>A</sup> , 19.9 <sup>K</sup>       |                   |                   | 23.4 <sup>at 150</sup>                      |                                            |       |
|                 | Ni+C              | Electroless deposition + CFUBMSIP |                                                                                                   |               | 0.8 <sup>A</sup> , 8.65 <sup>K</sup>        |                   |                   | 2.97 vs. 15.6 <sup>1 a</sup>                |                                            |       |
|                 |                   |                                   |                                                                                                   |               |                                             |                   |                   | 52.6 <sup>2, at 150</sup>                   |                                            |       |
| Cu              | -                 |                                   | 0.2M H <sub>2</sub> SO <sub>4</sub> ,                                                             | 25            | 51.4                                        |                   |                   |                                             | [133]                                      |       |
|                 | PPY               | electrodeposition                 | 0.1 M HCl,                                                                                        |               | 4.59                                        |                   |                   |                                             |                                            |       |
|                 | PPY/PANI          |                                   | 3 ppm HF                                                                                          |               | 1.62                                        |                   |                   |                                             |                                            |       |
| Cu-Cr slitina   | -                 |                                   | H <sub>2</sub> SO <sub>4</sub> (pH=3)                                                             | 80            | 42 <sup>A</sup> , 1480 <sup>K</sup>         |                   |                   | < 10 <sup>at 150</sup>                      | [172]                                      |       |
|                 | CrN               | Thermal nitridation               |                                                                                                   |               | 12.18 <sup>A</sup> , 1480 <sup>K</sup>      | 1300 <sup>S</sup> | 8 <sup>D</sup>    | < 10 <sup>at 150</sup>                      |                                            |       |
| Inconel 625     | -                 |                                   | 85% H <sub>3</sub> PO <sub>4</sub> , 30-120 °C                                                    | 30-120        | 0.16-20 μA                                  |                   |                   |                                             | [84]                                       |       |
| Inconel 825     | -                 |                                   |                                                                                                   |               | 0.13-32 μA                                  |                   |                   |                                             |                                            |       |
| Hastelloy C-276 | -                 |                                   |                                                                                                   |               | 0.19-24 μA                                  |                   |                   |                                             |                                            |       |
| Tantalum        | -                 |                                   | 85% H <sub>3</sub> PO <sub>4</sub>                                                                | 120           | 0.06 μA                                     |                   |                   |                                             |                                            |       |
| Titanium        | -                 |                                   |                                                                                                   |               | 6300 μA                                     |                   |                   |                                             |                                            |       |
| Titanium        | -                 |                                   | 1 mM H <sub>2</sub> SO <sub>4</sub> , 2 ppm F <sup>-</sup>                                        | 25            | 3.39E-3                                     |                   |                   |                                             | [185]                                      |       |
| Titanium        | -                 |                                   | 1 M H <sub>2</sub> SO <sub>4</sub> , 2 ppm F <sup>-</sup>                                         |               | 0.063A                                      | 0.033K            | -2 <sup>S</sup>   | 1.5 <sup>S</sup>                            | 52.6                                       | [145] |
|                 | TiN               | DCMS                              |                                                                                                   |               | 0.017A                                      | 0.019K            | -2.5 <sup>S</sup> | 1.8 <sup>S</sup>                            | 7.2                                        |       |
| Titanium        | -                 |                                   | 0.5 M H <sub>2</sub> SO <sub>4</sub> , 2 ppm HF                                                   | 25            | 0.042                                       |                   |                   |                                             |                                            | [144] |
|                 | TiN               | Multi-arc ion plating             |                                                                                                   |               | 8.6E-3                                      |                   |                   | 2.4 vs. 4.02, at 200                        |                                            |       |
| TiAl6V4         | -                 |                                   | 0.05 M H <sub>2</sub> SO <sub>4</sub> + Na <sub>2</sub> SO <sub>4</sub> (pH=1.5 to 3.5), 2 ppm HF | 75            | 719-192 <sup>D</sup> , 740-212 <sup>S</sup> |                   |                   | 919-503 <sup>D</sup> , 931-413 <sup>S</sup> | 90.6 vs. 101.92, <sup>at 150</sup> (pH1.5) | [29]  |

| Material     | Surface treatment | Method/technique                     | Electrolyte                                                                          | Temp. (°C) | icorr ( $\mu\text{A}/\text{cm}^2$ ) |                                                              |                                                     | ICR ( $\text{m}\Omega\text{cm}^2$ )<br>at 140 N/cm <sup>2</sup> | Citat. |
|--------------|-------------------|--------------------------------------|--------------------------------------------------------------------------------------|------------|-------------------------------------|--------------------------------------------------------------|-----------------------------------------------------|-----------------------------------------------------------------|--------|
|              |                   |                                      |                                                                                      |            | at Ecorr                            | at - 0.1 V/SCE                                               | at 0.6 V/SCE                                        |                                                                 |        |
|              | Ta <sub>2</sub> N | Double cathode glow discharge plasma |                                                                                      |            |                                     | -0.93 to -0.66 <sup>D</sup> ,<br>-0.91 to -0.64 <sup>S</sup> | 0.7-0.45 <sup>D</sup> , 0.7-<br>0.35 <sup>S</sup>   | 10.7 vs. 14.52, <sup>at 150</sup><br>(pH1.5)                    |        |
|              | -                 |                                      | 0.05 M H <sub>2</sub> SO <sub>4</sub> +<br>Na <sub>2</sub> SO <sub>4</sub> (pH=3.5), | 25-75      |                                     | 152-192 <sup>D</sup> , 115-<br>212 <sup>S</sup>              | 185-503 <sup>D</sup> , 245-<br>413 <sup>S</sup>     | 90.6 vs. 134.52, <sup>at 150</sup><br>(25 °C)                   |        |
|              | Ta <sub>2</sub> N | Double cathode glow discharge plasma | 2 ppm HF                                                                             |            |                                     | -0.35 to -0.66 <sup>D</sup> ,<br>-0.36 to -0.64 <sup>S</sup> | 0.18-0.45 <sup>D</sup> , 0.16-<br>0.35 <sup>S</sup> | 10.7 vs. 20.52, <sup>at 150</sup><br>(25 °C)                    |        |
| TiAl6V4      | -                 |                                      | 0.5 M H <sub>2</sub> SO <sub>4</sub> , 2-6<br>ppm HF                                 | 70         |                                     | 57.5-219 <sup>D</sup> ,<br>154-569 <sup>S</sup>              | 851-8190 <sup>D</sup> , 981-<br>6530 <sup>S</sup>   | 92.9 vs. 121.22, <sup>at 150</sup><br>(6 ppm)                   | [64]   |
|              | ZrCN              | Double cathode glow discharge plasma |                                                                                      |            |                                     | -0.33 to -0.56 <sup>D</sup> ,<br>-0.34 to -0.55 <sup>S</sup> | 15.1-44.7 <sup>D</sup> , 15.7-<br>43.5 <sup>S</sup> | 11.2 vs 17.12, <sup>at 150</sup> (6<br>ppm)                     |        |
| Ni40Ti40Nb20 | -                 |                                      | 1 M H <sub>2</sub> SO <sub>4</sub>                                                   | 70         | 0.35 <sup>A</sup> 1.3 <sup>K</sup>  | 4.7 <sup>D</sup>                                             | 2 <sup>D</sup>                                      | 54                                                              | [166]  |

Explanation to the table: A = anodic conditions (H<sub>2</sub> bubbled), K = cathodic conditions (air/oxygen bubbled), D = potentiodynamic test, S = potentiostatic test, 1 = after potentiostatic test at -0.1 V/SCE, 2 = after potentiostatic test at 0.6 V/SCE

Shortcut for methods: PVD = Physical Vapour Deposition, CAE-PVD = Cathodic Arc Evaporation Physical Vapour Deposition, CFUBMSIP = Closed Field Unbalanced Magnetron Sputter Ion Plating, DCMS = Direct Current Magnetron Sputtering

## References

- Asri, N.F.; Husaini, T.; Sulong, A.B.; Majlan, E.H.; Daud, W.R.W. Coating of stainless steel and titanium bipolar plates for anticorrosion in PEMFC: A review. *Int. J. Hydrogen Energy* **2017**, *42*, 9135–9148, doi:10.1016/j.ijhydene.2016.06.241.
- Alo, O.; Otunniyi, I.; Pienaar, H.; Iyuke, S. Materials for Bipolar Plates in Polymer Electrolyte Membrane Fuel Cell: Performance Criteria and Current Benchmarks. *Procedia Manuf.* **2017**, *7*, 395–401, doi:10.1016/j.promfg.2016.12.011.
- Karimi, S.; Fraser, N.; Roberts, B.; Foulkes, F.R. A Review of Metallic Bipolar Plates for Proton Exchange Membrane Fuel Cells: Materials and Fabrication Methods. *Adv. Mater. Sci. Eng.* **2012**, *2012*, 1–22, doi:10.1155/2012/828070.
- Taherian, R. RETRACTED: A review of composite and metallic bipolar plates in proton exchange membrane fuel cell: Materials, fabrication, and material selection. *J. Power Sources* **2014**, *265*, 370–390, doi:10.1016/j.jpowsour.2014.04.081.
- Li, X.; Sabir, I. Review of bipolar plates in PEM fuel cells: Flow-field designs. *Int. J. Hydrogen Energy* **2005**, *30*, 359–371, doi:10.1016/j.ijhydene.2004.09.019.
- Antunes, R.A.; Oliveira, M.C.L.; Ett, G.; Ett, V. Corrosion of metal bipolar plates for PEM fuel cells: A review. *Int. J. Hydrogen Energy* **2010**, *35*, 3632–3647, doi:10.1016/j.ijhydene.2010.01.059.
- Daud, W.; Rosli, R.; Majlan, E.; Hamid, S.; Mohamed, R.; Husaini, T. PEM fuel cell system control: A review. *Renew. Energy* **2017**, *113*, 620–638, doi:10.1016/j.renene.2017.06.027.
- Hermann, A.; Chaudhuri, T.; Spagnol, P. Bipolar plates for PEM fuel cells: A review. *Int. J. Hydrogen Energy* **2005**, *30*, 1297–1302, doi:10.1016/j.ijhydene.2005.04.016.
- Feng, K.; Cai, X.; Sun, H.; Li, Z.; Chu, P.K. Carbon coated stainless steel bipolar plates in polymer electrolyte membrane fuel cells. *Diam. Relat. Mater.* **2010**, *19*, 1354–1361, doi:10.1016/j.diamond.2010.07.003.
- Langemann, M.; Fritz, D.L.; Müller, M.; Stolten, D. Validation and characterization of suitable materials for bipolar plates in PEM water electrolysis. *Int. J. Hydrogen Energy* **2015**, *40*, 11385–11391, doi:10.1016/j.ijhydene.2015.04.155.
- DOE Technical Targets for Polymer Electrolyte Membrane Fuel Cell Components. Available online: <https://www.energy.gov/eere/fuelcells/doe-technical-targets-polymer-electrolyte-membrane-fuel-cell-components> (accessed on 30 April 2020).
- Kumar, A.; Ricketts, M.; Hirano, S. Ex situ evaluation of nanometer range gold coating on stainless steel substrate for automotive polymer electrolyte membrane fuel cell bipolar plate. *J. Power Sources* **2010**, *195*, 1401–1407, doi:10.1016/j.jpowsour.2009.09.022.
- Adrianowycz, O.; Norley, J.; Stuart, D.J.; Flaherty, D.W.; Wayne, R.; Williams, W.; Tietze, R.; Nguyen, Y.-L.H.; A.; Zawodzinski, T.; Pietrasz, P. Next Generation Bipolar Plates for Automotive PEM Fuel Cells. In *Next Generation Bipolar Plates for Automotive PEM Fuel Cells*; Office of Scientific and Technical Information (OSTI), 2010; pp. 849–854.
- San, F.G.B.; Okur, O. The effect of compression molding parameters on the electrical and physical properties of polymer composite bipolar plates. *Int. J. Hydrogen Energy* **2017**, *42*, 23054–23069, doi:10.1016/j.ijhydene.2017.07.175.
- Kang, K.; Park, S.; Jo, A.; Lee, K.; Ju, H. Development of ultralight and thin bipolar plates using epoxy-carbon fiber prepreps and graphite composites. *Int. J. Hydrogen Energy* **2017**, *42*, 1691–1697, doi:10.1016/j.ijhydene.2016.05.027.
- André, J.; Antoni, L.; Petit, J.-P. Corrosion resistance of stainless steel bipolar plates in a PEFC environment: A comprehensive study. *Int. J. Hydrogen Energy* **2010**, *35*, 3684–3697, doi:10.1016/j.ijhydene.2010.01.062.
- Tawfik, H.; Hung, Y., and Mahajan, D., Metal bipolar plates for PEM fuel cell - A review. *J. Power Sources* **2007**, *163*, 755–767.
- Antunes, R.A.; de Oliveira, M.C.; Ett, G.; Ett, V. Carbon materials in composite bipolar plates for polymer electrolyte membrane fuel cells: A review of the main challenges to improve electrical performance. *J. Power Sources* **2011**, *196*, 2945–2961, doi:10.1016/j.jpowsour.2010.12.041.
- Radzuan, N.A.M.; Sulong, A.B.; Sahari, J. A review of electrical conductivity models for conductive polymer composite. *Int. J. Hydrogen Energy* **2017**, *42*, 9262–9273, doi:10.1016/j.ijhydene.2016.03.045.
- Kuan, H.-C.; Ma, C.-C.M.; Chen, K.H., and Chen, S.-M., Preparation, electrical, mechanical and thermal properties of composite bipolar plate for a fuel cell. *J. Power Sources* **2004**, *134*, 7–17.
- Bolouri, A. and Kang, C.G., Study on dimensional and corrosion properties of thixoformed A356 and AA7075 aluminum bipolar plates for proton exchange membrane fuel cells. *Renew. Energy* **2014**, *71*, 616–628.



22. Wang, Y.; Northwood, D.O. Effects of O<sub>2</sub> and H<sub>2</sub> on the corrosion of SS316L metallic bipolar plate materials in simulated anode and cathode environments of PEM fuel cells. *Electrochimica Acta* **2007**, *52*, 6793–6798, doi:10.1016/j.electacta.2007.05.001.
23. Orsi, A.; Kongstein, O.; Hamilton, P.; Oedegaard, A.; Svenum, I.; Cooke, K. An investigation of the typical corrosion parameters used to test polymer electrolyte fuel cell bipolar plate coatings, with titanium nitride coated stainless steel as a case study. *J. Power Sources* **2015**, *285*, 530–537, doi:10.1016/j.jpowsour.2015.03.111.
24. Bi, F.; Li, X.; Yi, P.; Hou, K.; Peng, L.; Lai, X. Characteristics of amorphous carbon films to resist high potential impact in PEMFCs bipolar plates for automotive application. *Int. J. Hydrogen Energy* **2017**, *42*, 14279–14289, doi:10.1016/j.ijhydene.2017.04.113.
25. Mendizabal, L.; Oedegaard, A.; Kongstein, O.E.; Lædre, S.; Walmsley, J.; Barriga, J.; Gonzalez, J.J. TaNX coatings deposited by HPPMS on SS316L bipolar plates for polymer electrolyte membrane fuel cells: Correlation between corrosion current, contact resistance and barrier oxide film formation. *Int. J. Hydrogen Energy* **2017**, *42*, 3259–3270, doi:10.1016/j.ijhydene.2017.01.070.
26. Mingge, W.; Congda, L.; Tao, H.; Guohai, C.; Donghui, W.; Haifeng, Z.; Dong, Z.; Aiying, W. Chromium interlayer amorphous carbon film for 304 stainless steel bipolar plate of proton exchange membrane fuel cell. *Surf. Coatings Technol.* **2016**, *307*, 374–381, doi:10.1016/j.surfcoat.2016.07.069.
27. Hinds, G.; Brightman, E. Towards more representative test methods for corrosion resistance of PEMFC metallic bipolar plates. *Int. J. Hydrogen Energy* **2015**, *40*, 2785–2791, doi:10.1016/j.ijhydene.2014.12.085.
28. Agneaux, A.; Plouzenec, M.H.; Antoni, L.; Granier, J. Corrosion Behaviour of Stainless Steel Plates in PEMFC Working Conditions. *Fuel Cells* **2006**, *6*, 47–53, doi:10.1002/fuce.200500100.
29. Huang, N.; Yu, H.; Xu, L.; Zhan, S.; Sun, M.; Kirk, D.W. Corrosion kinetics of 316L stainless steel bipolar plate with chromiumcarbide coating in simulated PEMFC cathodic environment. *Results Phys.* **2016**, *6*, 730–736, doi:10.1016/j.rinp.2016.10.002.
30. Ren, Y.J.; Chen, J.; Zeng, C.L.; Li, C., and He, J.J., Electrochemical corrosion characteristics of conducting polypyr-ole/polyaniline coatings in simulated environments of a proton exchange membrane fuel cell. *Int. J. Hydrog. Energy* **2016**, *41*, 8542–8549.
31. Ma, J.J.; Xu, J.; Jiang, S.; Munroe, P.; Xie, Z.-H. Effects of pH value and temperature on the corrosion behavior of a Ta<sub>2</sub>N nanoceramic coating in simulated polymer electrolyte membrane fuel cell environment. *Ceram. Int.* **2016**, *42*, 16833–16851, doi:10.1016/j.ceramint.2016.07.175.
32. Jin, J.; Zheng, D.; Liu, H. The corrosion behavior and mechanical properties of CrN/Ni P multilayer coated mild steel as bipolar plates for proton exchange membrane fuel cells. *Int. J. Hydrogen Energy* **2017**, *42*, 28883–28897, doi:10.1016/j.ijhydene.2017.10.046.
33. Huang, N.; Liang, C.; Wang, H.; Xu, L.; Xu, H. Corrosion Behavior of Passivated 316LSS with Ag Coating as PEMFC Bipolar Plate. *Int. J. Corros.* **2011**, *2011*, 1–7, doi:10.1155/2011/103785.
34. Feng, K.; Wu, G.; Li, Z.; Cai, X.; Chu, P.K. Corrosion behavior of SS316L in simulated and accelerated PEMFC environments. *Int. J. Hydrogen Energy* **2011**, *36*, 13032–13042, doi:10.1016/j.ijhydene.2011.07.058.
35. Dadfar, M.; Salehi, M.; Golozar, M.A., and Trasatti, S., Surface modification of 304 stainless steels to improve corrosion behavior and interfacial contact resistance of bipolar plates. *Int. J. Hydrog. Energy* **2016**, *41*, 21375–21384.
36. Jin, J.; Zhu, Z.; Zheng, D. Influence of Ti content on the corrosion properties and contact resistance of CrTiN coating in simulated proton exchange membrane fuel cells. *Int. J. Hydrogen Energy* **2017**, *42*, 11758–11770, doi:10.1016/j.ijhydene.2017.02.014.
37. Lim, J.W.; Lee, D.; Kim, M.; Choe, J.; Nam, S.; Gil Lee, D. Composite structures for proton exchange membrane fuel cells (PEMFC) and energy storage systems (ESS): Review. *Compos. Struct.* **2015**, *134*, 927–949, doi:10.1016/j.compstruct.2015.08.121.
38. Yoon, W.; Huang, X.; Fazzino, P.; Reifsnider, K.L.; Akkaoui, M.A. Evaluation of coated metallic bipolar plates for polymer electrolyte membrane fuel cells. *J. Power Sources* **2008**, *179*, 265–273, doi:10.1016/j.jpowsour.2007.12.034.
39. Rajaei, V.; Rashtchi, H.; Raeissi, K.; Shamanian, M. The study of Ni-based nano-crystalline and amorphous alloy coatings on AISI 304 stainless steel for PEM fuel cell bipolar plate application. *Int. J. Hydrogen Energy* **2017**, *42*, 14264–14278, doi:10.1016/j.ijhydene.2017.04.098.
40. Fetohi, A.E.; Hameed, R.A.; El-Khatib, K.; Souaya, E.R. Ni–P and Ni–Co–P coated aluminum alloy 5251 substrates as metallic bipolar plates for PEM fuel cell applications. *Int. J. Hydrogen Energy* **2012**, *37*, 7677–7688, doi:10.1016/j.ijhydene.2012.01.145.
41. Zhang, D.; Duan, L.; Guo, L., and Tuan, W.-H., Corrosion behavior of TiN-coated stainless steel as bipolar plate for proton exchange membrane fuel cell. *Int. J. Hydrog. Energy* **2010**, *35*, 3721–3726.

42. Zhang, D.; Wang, Z.; Huang, K. Composite coatings with in situ formation for Fe–Ni–Cr alloy as bipolar plate of PEMFC. *Int. J. Hydrogen Energy* **2013**, *38*, 11379–11391, doi:10.1016/j.ijhydene.2013.06.112.
43. Richards, J.; Cremers, C.; Fischer, P.; Schmidt, K. Corrosion Studies on Electro Polished Stainless Steels for the Use as Metallic Bipolar Plates in PEMFC Applications. *Energy Procedia* **2012**, *20*, 324–333, doi:10.1016/j.egypro.2012.03.032.
44. Yang, M.; Zhang, D. Effect of surface treatment on the interfacial contact resistance and corrosion resistance of Fe–Ni–Cr alloy as a bipolar plate for polymer electrolyte membrane fuel cells. *Energy* **2014**, *64*, 242–247, doi:10.1016/j.energy.2013.10.080.
45. Wu, B.; Lin, G.; Fu, Y.; Hou, M.; Yi, B. Chromium-containing carbon film on stainless steel as bipolar plates for proton exchange membrane fuel cells. *Int. J. Hydrogen Energy* **2010**, *35*, 13255–13261, doi:10.1016/j.ijhydene.2010.09.036.
46. Fetohi, A.E.; Hameed, R.A.; El-Khatib, K.; Souaya, E.R. Study of different aluminum alloy substrates coated with Ni–Co–P as metallic bipolar plates for PEM fuel cell applications. *Int. J. Hydrogen Energy* **2012**, *37*, 10807–10817, doi:10.1016/j.ijhydene.2012.04.066.
47. Barranco, J.; Barreras, F.; Lozano, A., and Maza, M., Influence of CrN-coating thickness on the corrosion resistance behaviour of aluminium-based bipolar plates. *J. Power Sources* **2011**, *196*, 4283–4289.
48. Sun, H.; Cooke, K.; Eitzinger, G.; Hamilton, P.; Pollet, B. Development of PVD coatings for PEMFC metallic bipolar plates. *Thin Solid Films* **2013**, *528*, 199–204, doi:10.1016/j.tsf.2012.10.094.
49. Gabreab, E.M.; Hinds, G.; Fearn, S.; Hodgson, D.; Millichamp, J.; Shearing, P.R.; Brett, D.J. An electrochemical treatment to improve corrosion and contact resistance of stainless steel bipolar plates used in polymer electrolyte fuel cells. *J. Power Sources* **2014**, *245*, 1014–1026, doi:10.1016/j.jpowsour.2013.07.041.
50. Iversen, A. Stainless steels in bipolar plates—Surface resistive properties of corrosion resistant steel grades during current loads. *Corros. Sci.* **2006**, *48*, 1036–1058, doi:10.1016/j.corsci.2005.05.012.
51. Brady, M.; Elhamid, M.A.; Dadheech, G.; Bradley, J.; Toops, T.; Meyer, H.; Tortorelli, P. Manufacturing and performance assessment of stamped, laser welded, and nitrided FeCrV stainless steel bipolar plates for proton exchange membrane fuel cells. *Int. J. Hydrogen Energy* **2013**, *38*, 4734–4739, doi:10.1016/j.ijhydene.2013.01.143.
52. Kumagai, M.; Myung, S.-T.; Kuwata, S.; Asaishi, R.; Yashiro, H. Corrosion behavior of austenitic stainless steels as a function of pH for use as bipolar plates in polymer electrolyte membrane fuel cells. *Electrochimica Acta* **2008**, *53*, 4205–4212, doi:10.1016/j.electacta.2007.12.078.
53. Lin, K.; Li, X.; Dong, H.; Du, S.; Lu, Y.; Ji, X.; Gu, D. Surface modification of 316 stainless steel with platinum for the application of bipolar plates in high performance proton exchange membrane fuel cells. *Int. J. Hydrogen Energy* **2017**, *42*, 2338–2348, doi:10.1016/j.ijhydene.2016.09.220.
54. Chen, C.-Y.; Su, S.-C. Effects of assembly torque on a proton exchange membrane fuel cell with stamped metallic bipolar plates. *Energy* **2018**, *159*, 440–447, doi:10.1016/j.energy.2018.06.168.
55. Wang, H.-C.; Sheu, H.-H.; Lu, C.-E.; Hou, K.-H.; Ger, M.-D. Preparation of corrosion-resistant and conductive trivalent Cr–C coatings on 304 stainless steel for use as bipolar plates in proton exchange membrane fuel cells by electrodeposition. *J. Power Sources* **2015**, *293*, 475–483, doi:10.1016/j.jpowsour.2015.05.105.
56. Wind, J.; Späh, R.; Kaiser, W.; Böhm, G. Metallic bipolar plates for PEM fuel cells. *J. Power Sources* **2002**, *105*, 256–260, doi:10.1016/s0378-7753(01)00950-8.
57. Brady, M.; Weisbrod, K.; Paulauskas, I.; Buchanan, R.; More, K.; Wang, H.; Wilson, M.; Garzon, F.; Walker, L. Preferential thermal nitridation to form pin-hole free Cr-nitrides to protect proton exchange membrane fuel cell metallic bipolar plates. *Scr. Mater.* **2004**, *50*, 1017–1022, doi:10.1016/j.scriptamat.2003.12.028.
58. Hung, Y.; Tawfik, H.; Mahajan, D. Durability and characterization studies of chromium carbide coated aluminum fuel cell stack. *Int. J. Hydrogen Energy* **2016**, *41*, 12273–12284, doi:10.1016/j.ijhydene.2016.05.136.
59. Barranco, J.; Barreras, F.; Lozano, A.; Lopez, A.M.; Roda, V.; Martín, J.; Maza, M.; Fuentes, G.G.; Almandoz, E.; López-Sabirón, A.M. Cr and Zr/Cr nitride CAE-PVD coated aluminum bipolar plates for polymer electrolyte membrane fuel cells. *Int. J. Hydrogen Energy* **2010**, *35*, 11489–11498, doi:10.1016/j.ijhydene.2010.05.050.
60. Feng, K.; Guo, X.; Li, Z.; Yao, C.; Wu, Y. Investigation of multi-coating process treated magnesium alloy as bipolar plate in polymer electrolyte membrane fuel cell. *Int. J. Hydrogen Energy* **2016**, *41*, 6020–6028, doi:10.1016/j.ijhydene.2016.02.147.
61. Yi, P.; Peng, L.; Zhou, T.; Wu, H.; Lai, X. Cr–N–C multilayer film on 316L stainless steel as bipolar plates for proton exchange membrane fuel cells using closed field unbalanced magnetron sputter ion plating. *Int. J. Hydrogen Energy* **2013**, *38*, 1535–1543, doi:10.1016/j.ijhydene.2012.11.030.
62. Proctor, S.; Linholm, L. A direct measurement of interfacial contact resistance. *IEEE Electron Device Lett.* **1982**, *3*, 294–296, doi:10.1109/edl.1982.25574.

- 
63. Turan, C.; Cora, Ömer, N.; Koç, M. Effect of manufacturing processes on contact resistance characteristics of metallic bipolar plates in PEM fuel cells. *Int. J. Hydrogen Energy* **2011**, *36*, 12370–12380, doi:10.1016/j.ijhydene.2011.06.091.
  64. Makkus, R.C.; Janssen, A.H.; A. de Bruijn, F.; Mallant, R.K. Use of stainless steel for cost competitive bipolar plates in the SPFC. *J. Power Sources* **2000**, *86*, 274–282, doi:10.1016/s0378-7753(99)00460-7.
  65. Lædre, S.; Kongstein, O.E.; Oedegaard, A.; Seland, F.; Karoliussen, H. Measuring In Situ Interfacial Contact Resistance in a Proton Exchange Membrane Fuel Cell. *J. Electrochem. Soc.* **2019**, *166*, F853–F859, doi:10.1149/2.1511912jes.
  66. Xu, J.; Huang, H.J.; Li, Z.; Xu, S.; Tao, H.; Munroe, P.; Xie, Z.-H. Corrosion behavior of a ZrCN coated Ti alloy with potential application as a bipolar plate for proton exchange membrane fuel cell. *J. Alloy. Compd.* **2016**, *663*, 718–730, doi:10.1016/j.jallcom.2015.12.197.
  67. Omrani, M.; Habibi, M., and Moti Birjandi, M.S., Enhanced electrical conductivity of two layers AlN-TiN coating on SS316L as bipolar plate using plasma focus device. *Int. J. Hydrog. Energy* **2016**, *41*, 5028–5036.
  68. Wang, S.; Hou, M.; Zhao, Q.; Jiang, Y.; Wang, Z.; Li, H.; Fu, Y., and Shao, Z., Ti/(Ti,Cr)N/CrN multilayer coated 316L stainless steel by arc ion plating as bipolar plates for proton exchange membrane fuel cells. *J. Energy Chem.* **2017**, *26*, 168–174.
  69. Wang, L.; Northwood, D.; Nie, X.; Housden, J.; Spain, E.; Leyland, A.; Matthews, A. Corrosion properties and contact resistance of TiN, TiAlN and CrN coatings in simulated proton exchange membrane fuel cell environments. *J. Power Sources* **2010**, *195*, 3814–3821, doi:10.1016/j.jpowsour.2009.12.127.
  70. Liang, P.; Qiu, D.; Peng, L.; Yi, P.; Lai, X.; Ni, J. Contact resistance prediction of proton exchange membrane fuel cell considering fabrication characteristics of metallic bipolar plates. *Energy Convers. Manag.* **2018**, *169*, 334–344, doi:10.1016/j.enconman.2018.05.069.
  71. Wang, L.; Sun, J.; Sun, J.; Lv, Y.; Li, S.; Ji, S.; Wen, Z. Niobium nitride modified AISI 304 stainless steel bipolar plate for proton exchange membrane fuel cell. *J. Power Sources* **2012**, *199*, 195–200, doi:10.1016/j.jpowsour.2011.10.034.
  72. Dadfar, M.; Salehi, M.; Golozar, M.; Trasatti, S.; Casaletto, M. Surface and corrosion properties of modified passive layer on 304 stainless steel as bipolar plates for PEMFCs. *Int. J. Hydrogen Energy* **2017**, *42*, 25869–25876, doi:10.1016/j.ijhydene.2017.08.169.
  73. Shimpalee, S.; Lilavivat, V.; McCrabb, H.; Khunatorn, Y.; Lee, H.-K.; Lee, W.-K.; Weidner, J. Investigation of bipolar plate materials for proton exchange membrane fuel cells. *Int. J. Hydrogen Energy* **2016**, *41*, 13688–13696, doi:10.1016/j.ijhydene.2016.05.163.
  74. Choe, C.; Choi, H.; Hong, W.; Lee, J.-J. Tantalum nitride coated AISI 316L as bipolar plate for polymer electrolyte membrane fuel cell. *Int. J. Hydrogen Energy* **2012**, *37*, 405–411, doi:10.1016/j.ijhydene.2011.09.060.
  75. Lin, K.; Li, X.; Tian, L.; Dong, H. Active screen plasma surface co-alloying of 316 austenitic stainless steel with both nitrogen and niobium for the application of bipolar plates in proton exchange membrane fuel cells. *Int. J. Hydrogen Energy* **2015**, *40*, 10281–10292, doi:10.1016/j.ijhydene.2015.06.010.
  76. Jinlong, L.; Zhuqing, W.; Tongxiang, L.; Ken, S.; Hideo, M. Enhancing the corrosion resistance of the 2205 duplex stainless steel bipolar plates in PEMFCs environment by surface enriched molybdenum. *Results Phys.* **2017**, *7*, 3459–3464, doi:10.1016/j.rinp.2017.09.001.
  77. Fukutsuka, T.; Yamaguchi, T.; Miyano, S.-I.; Matsuo, Y.; Sugie, Y.; Ogumi, Z. Carbon-coated stainless steel as PEFC bipolar plate material. *J. Power Sources* **2007**, *174*, 199–205, doi:10.1016/j.jpowsour.2007.08.096.
  78. Lee, S.; Pukha, V.; Vinogradov, V.; Kakati, N.; Jee, S.; Cho, S.; Yoon, Y. Nanocomposite-carbon coated at low-temperature: A new coating material for metallic bipolar plates of polymer electrolyte membrane fuel cells. *Int. J. Hydrogen Energy* **2013**, *38*, 14284–14294, doi:10.1016/j.ijhydene.2013.08.013.
  79. Wang, Y.; Pu, J.; Wang, J.; Li, J.; Chen, J.; Xue, Q. Interlayer design for the graphite-like carbon film with high load-bearing capacity under sliding-friction condition in water. *Appl. Surf. Sci.* **2014**, *311*, 816–824, doi:10.1016/j.apsusc.2014.05.172.
  80. Joseph, S.; McClure, J.; Chianelli, R.; Pich, P.; Sebastian, P. Conducting polymer-coated stainless steel bipolar plates for proton exchange membrane fuel cells (PEMFC). *Int. J. Hydrogen Energy* **2005**, *30*, 1339–1344, doi:10.1016/j.ijhydene.2005.04.011.
  81. Feng, K.; Li, Z.; Sun, H.; Yu, L.; Cai, X.; Wu, Y.; Chu, P.K. C/CrN multilayer coating for polymer electrolyte membrane fuel cell metallic bipolar plates. *J. Power Sources* **2013**, *222*, 351–358, doi:10.1016/j.jpowsour.2012.08.087.

82. Mo, J.; Steen, S.M.; Zhang, F.-Y.; Toops, T.J.; Brady, M.P.; Green, J.B. Electrochemical investigation of stainless steel corrosion in a proton exchange membrane electrolyzer cell. *Int. J. Hydrogen Energy* **2015**, *40*, 12506–12511, doi:10.1016/j.ijhydene.2015.07.061.
83. Kumagai, M.; Myung, S.-T.; Katada, Y.; Yashiro, H. Stability of type 310S stainless steel bipolar plates tested at various current densities in proton exchange membrane fuel cells. *Electrochimica Acta* **2016**, *211*, 754–760, doi:10.1016/j.electacta.2016.06.106.
84. Pardo, A.; Merino, M.; Coy, A.E.; Viejo, F.; Arrabal, R.; Matykina, E. Effect of Mo and Mn additions on the corrosion behaviour of AISI 304 and 316 stainless steels in H<sub>2</sub>SO<sub>4</sub>. *Corros. Sci.* **2008**, *50*, 780–794, doi:10.1016/j.corsci.2007.11.004.
85. Li, D.; Wang, J.; Chen, D.; Liang, P. Molybdenum addition enhancing the corrosion behaviors of 316 L stainless steel in the simulated cathodic environment of proton exchange membrane fuel cell. *Int. J. Hydrogen Energy* **2015**, *40*, 5947–5957, doi:10.1016/j.ijhydene.2015.01.165.
86. Lavigne, O.; Alémany-Dumont, C.; Normand, B.; Delichère, P.; Descamps, A. Cerium insertion in 316L passive film: Effect on conductivity and corrosion resistance performances of metallic bipolar plates for PEM fuel cell application. *Surf. Coatings Technol.* **2010**, *205*, 1870–1877, doi:10.1016/j.surfcoat.2010.08.051.
87. Yun, Y.-H. Deposition of gold–titanium and gold–nickel coatings on electropolished 316L stainless steel bipolar plates for proton exchange membrane fuel cells. *Int. J. Hydrogen Energy* **2010**, *35*, 1713–1718, doi:10.1016/j.ijhydene.2009.12.036.
88. Wang, L.; Sun, J.; Kang, B.; Li, S.; Ji, S.; Wen, Z.; Wang, X. Electrochemical behaviour and surface conductivity of niobium carbide-modified austenitic stainless steel bipolar plate. *J. Power Sources* **2014**, *246*, 775–782, doi:10.1016/j.jpowsour.2013.08.025.
89. Turan, C.; Cora, Ömer, N.; Koç, M. Contact resistance characteristics of coated metallic bipolar plates for PEM fuel cells – investigations on the effect of manufacturing. *Int. J. Hydrogen Energy* **2012**, *37*, 18187–18204, doi:10.1016/j.ijhydene.2012.09.042.
90. Liu, C.; Bi, Q.; Leyland, A.; Matthews, A. An electrochemical impedance spectroscopy study of the corrosion behaviour of PVD coated steels in 0.5 N NaCl aqueous solution: Part II. *Corros. Sci.* **2003**, *45*, 1257–1273, doi:10.1016/s0010-938x(02)00214-7.
91. Wang, L.; Sun, J.; Li, P.; Sun, J.; Lv, Y.; Jing, B.; Li, S.; Ji, S.; Wen, Z. Molybdenum nitride modified AISI 304 stainless steel bipolar plate for proton exchange membrane fuel cell. *Int. J. Hydrogen Energy* **2012**, *37*, 5876–5883, doi:10.1016/j.ijhydene.2011.12.147.
92. Lee, W.-J.; Yun, E.-Y.; Lee, H.-B.-R.; Hong, S.W., and Kwon, S.-H., Ultrathin effective TiN protective films prepared by plas-ma-enhanced atomic layer deposition for high performance metallic bipolar plates of polymer electrolyte membrane fuel cells. *Appl. Surf. Sci.* **2020**, *519*, 146215.
93. Fu, Y.; Lin, G.; Hou, M.; Wu, B.; Li, H.; Hao, L.; Shao, Z.; Yi, B. Optimized Cr-nitride film on 316L stainless steel as proton exchange membrane fuel cell bipolar plate. *Int. J. Hydrogen Energy* **2009**, *34*, 453–458, doi:10.1016/j.ijhydene.2008.09.104.
94. Shen, H.; Wang, L., and Sun, J., Characteristics and properties of CrN compound layer produced by plasma nitriding of Cr-electroplated of AISI 304 stainless steel. *Surf. Coat. Tech.* **2020**, *385*, 125450.
95. Haye, E.; Deschamps, F.; Caldarella, G.; Piedboeuf, M.-L.; Lafort, A.; Cornil, H.; Colomer, J.-F.; Pireaux, J.-J.; Job, N. Formable chromium nitride coatings for proton exchange membrane fuel cell stainless steel bipolar plates. *Int. J. Hydrogen Energy* **2020**, *45*, 15358–15365, doi:10.1016/j.ijhydene.2020.03.248.
96. Yang, L.X.; Liu, R.J.; Wang, Y.; Liu, H.J.; Zeng, C.L.; Fu, C. Growth of nanocrystalline  $\beta$ -Nb<sub>2</sub>N coating on 430 ferritic stainless steel bipolar plates of PEMFCs by disproportionation reaction of Nb(IV) ions in molten salt. *Corros. Sci.* **2020**, *174*, 108862, doi:10.1016/j.corsci.2020.108862.
97. Xu, J.; Xu, S.; Munroe, P.; Xie, Z.-H. A ZrN nanocrystalline coating for polymer electrolyte membrane fuel cell metallic bipolar plates prepared by reactive sputter deposition. *RSC Adv.* **2015**, *5*, 67348–67356, doi:10.1039/c5ra09733a.
98. Song, M.; Guo, J.; Yang, Y.; Geng, K.; Xiang, M.; Zhu, Q.; Hu, C.; Zhao, H. Fe<sub>2</sub>Ti interlayer for improved adhesion strength and corrosion resistance of TiN coating on stainless steel 316L. *Appl. Surf. Sci.* **2020**, *504*, 144483, doi:10.1016/j.apsusc.2019.144483.
99. Zhang, M.; Kim, K.H.; Shao, Z.; Wang, F.; Zhao, S.; Suo, N. Effects of Mo content on microstructure and corrosion resistance of arc ion plated Ti–Mo–N films on 316L stainless steel as bipolar plates for polymer exchange membrane fuel cells. *J. Power Sources* **2014**, *253*, 201–204, doi:10.1016/j.jpowsour.2013.12.075.
100. Jin, J.; Hu, M.; Zhao, X. Investigation of incorporating oxygen into TiN coating to resist high potential effects on PEMFC bipolar plates in vehicle applications. *Int. J. Hydrogen Energy* **2020**, *45*, 23310–23326, doi:10.1016/j.ijhydene.2020.06.059.

101. Bi, F.; Yi, P.; Zhou, T.; Peng, L.; Lai, X. Effects of Al incorporation on the interfacial conductivity and corrosion resistance of CrN film on SS316L as bipolar plates for proton exchange membrane fuel cells. *Int. J. Hydrogen Energy* **2015**, *40*, 9790–9802, doi:10.1016/j.ijhydene.2015.06.012.
102. Ingle, A.V.; Raja, V.S.; Rangarajan, J., and Mishra, P., Corrosion resistant quaternary Al–Cr–Mo–N coating on type 316L stainless steel bipolar plates for proton exchange membrane fuel cells. *Int. J. Hydrog. Energy* **2020**, *45*, 3094–3107.
103. Dong, Z.; Zhou, T.; Liu, J.; Zhang, X.; Shen, B.; Hu, W.; Liu, L. Performance of surface chromizing layer on 316L stainless steel for proton exchange membrane fuel cell bipolar plates. *Int. J. Hydrogen Energy* **2019**, *44*, 22110–22121, doi:10.1016/j.ijhydene.2019.06.099.
104. Dong, Z.; Zhou, T.; Liu, J.; Zhang, X.; Shen, B.; Hu, W.; Liu, L. Effects of pack chromizing on the microstructure and anticorrosion properties of 316L stainless steel. *Surf. Coatings Technol.* **2019**, *366*, 86–96, doi:10.1016/j.surfcoat.2019.03.022.
105. Yang, L.; Yu, H.; Jiang, L.; Zhu, L.; Jian, X.; Wang, Z. Improved anticorrosion properties and electrical conductivity of 316L stainless steel as bipolar plate for proton exchange membrane fuel cell by lower temperature chromizing treatment. *J. Power Sources* **2010**, *195*, 2810–2814, doi:10.1016/j.jpowsour.2009.11.018.
106. Bai, C.-Y.; Wen, T.-M.; Hou, K.-H.; Ger, M.-D. The bipolar plate of AISI 1045 steel with chromized coatings prepared by low-temperature pack cementation for proton exchange membrane fuel cell. *J. Power Sources* **2010**, *195*, 779–786, doi:10.1016/j.jpowsour.2009.08.036.
107. Bai, C.-Y.; Ger, M.-D.; Wu, M.-S. Corrosion behaviors and contact resistances of the low-carbon steel bipolar plate with a chromized coating containing carbides and nitrides. *Int. J. Hydrogen Energy* **2009**, *34*, 6778–6789, doi:10.1016/j.ijhydene.2009.05.103.
108. Wang, H.-C.; Hou, K.-H.; Lu, C.-E.; Ger, M.-D. The study of electroplating trivalent CrC alloy coatings with different current densities on stainless steel 304 as bipolar plate of proton exchange membrane fuel cells. *Thin Solid Films* **2014**, *570*, 209–214, doi:10.1016/j.tsf.2014.03.034.
109. Zhao, Y.; Wei, L.; Yi, P.; Peng, L. Influence of Cr-C film composition on electrical and corrosion properties of 316L stainless steel as bipolar plates for PEMFCs. *Int. J. Hydrogen Energy* **2016**, *41*, 1142–1150, doi:10.1016/j.ijhydene.2015.10.047.
110. Wang, L.; Tao, Y.; Zhang, Z.; Wang, Y.; Feng, Q.; Wang, H.; Li, H. Molybdenum carbide coated 316L stainless steel for bipolar plates of proton exchange membrane fuel cells. *Int. J. Hydrogen Energy* **2019**, *44*, 4940–4950, doi:10.1016/j.ijhydene.2018.12.184.
111. Abbas, N.; Qin, X.; Ali, S.; Zhu, G.; Lu, J.; E.; Alam, F.; Wattoo, A.G.; Zeng, X.; Gu, K.; Tang, J. Direct deposition of extremely low interface-contact-resistant Ti<sub>2</sub>AlC MAX-phase coating on stainless-steel by mid-frequency magnetron sputtering method. *J. Eur. Ceram. Soc.* **2020**, *40*, 3338–3342, doi:10.1016/j.jeurceramsoc.2020.02.033.
112. Abbas, N.; Qin, X.; Ali, S.; Zhu, G.; Yi, Z.; Yang, X.; Zeng, X.; Ullah, Z.; Gu, K.; Tang, J. Study of microstructural variation with annealing temperature of Ti–Al–C films coated on stainless steel substrates. *Int. J. Hydrogen Energy* **2020**, *45*, 3186–3192, doi:10.1016/j.ijhydene.2019.11.163.
113. Lu, J.; Abbas, N.; Tang, J.; Zhu, G. Synthesis and characterization of conductive ceramic MAX-phase coatings for metal bipolar plates in simulated PEMFC environments. *Corros. Sci.* **2019**, *158*, doi:10.1016/j.corsci.2019.108106.
114. Lu, J.; Abbas, N.; Tang, J.; Hu, R.; Zhu, G. Characterization of Ti<sub>3</sub>SiC<sub>2</sub>-coating on stainless steel bipolar plates in simulated proton exchange membrane fuel cell environments. *Electrochem. Commun.* **2019**, *105*, 106490, doi:10.1016/j.elecom.2019.106490.
115. Li, H.; Guo, P.; Zhang, D.; Liu, L.; Wang, Z.; Ma, G.; Xin, Y.; Ke, P.; Saito, H.; Wang, A. Interface-induced degradation of amorphous carbon films/stainless steel bipolar plates in proton exchange membrane fuel cells. *J. Power Sources* **2020**, *469*, 228269, doi:10.1016/j.jpowsour.2020.228269.
116. Chung, C.-Y.; Chen, S.-K.; Chiu, P.-J.; Chang, M.-H.; Hung, T.-T.; Ko, T.-H. Carbon film-coated 304 stainless steel as PEMFC bipolar plate. *J. Power Sources* **2008**, *176*, 276–281, doi:10.1016/j.jpowsour.2007.10.022.
117. Pu, N.-W.; Shi, G.-N.; Liu, Y.-M.; Sun, X.; Chang, J.-K.; Sun, C.-L.; Ger, M.-D.; Chen, C.-Y.; Wang, P.-C.; Peng, Y.-Y.; et al. Graphene grown on stainless steel as a high-performance and ecofriendly anti-corrosion coating for polymer electrolyte membrane fuel cell bipolar plates. *J. Power Sources* **2015**, *282*, 248–256, doi:10.1016/j.jpowsour.2015.02.055.
118. Hou, K.; Yi, P.; Peng, L.; Lai, X. Niobium doped amorphous carbon film on metallic bipolar plates for PEMFCs: First principle calculation, microstructure and performance. *Int. J. Hydrogen Energy* **2019**, *44*, 3144–3156, doi:10.1016/j.ijhydene.2018.12.040.
119. Zhang, D.; Yi, P.; Peng, L.; Lai, X.; Pu, J. Amorphous carbon films doped with silver and chromium to achieve ultra-low interfacial electrical resistance and long-term durability in the application of proton exchange membrane fuel cells. *Carbon* **2019**, *145*, 333–344, doi:10.1016/j.carbon.2019.01.050.

- 
120. Alaefour, I.; Shahgaldi, S.; Zhao, J.; Li, X. Synthesis and Ex-Situ characterizations of diamond-like carbon coatings for metallic bipolar plates in PEM fuel cells. *Int. J. Hydrogen Energy* **2021**, *46*, 11059–11070, doi:10.1016/j.ijhydene.2020.09.259.
  121. Che, J.; Yi, P.; Peng, L.; Lai, X. Impact of pressure on carbon films by PECVD toward high deposition rates and high stability as metallic bipolar plate for PEMFCs. *Int. J. Hydrogen Energy* **2020**, *45*, 16277–16286, doi:10.1016/j.ijhydene.2020.04.078.
  122. Włodarczyk, R.; Zasada, D.; Morel, S.; Kacprzak, A. A comparison of nickel coated and uncoated sintered stainless steel used as bipolar plates in low-temperature fuel cells. *Int. J. Hydrogen Energy* **2016**, *41*, 17644–17651, doi:10.1016/j.ijhydene.2016.07.231.
  123. Yi, P.; Peng, L.; Zhou, T.; Huang, J.; Lai, X. Composition optimization of multilayered chromium-nitride-carbon film on 316L stainless steel as bipolar plates for proton exchange membrane fuel cells. *J. Power Sources* **2013**, *236*, 47–53, doi:10.1016/j.jpowsour.2013.02.034.
  124. Fu, Y.; Lin, G.; Hou, M.; Wu, B.; Shao, Z.; Yi, B. Carbon-based films coated 316L stainless steel as bipolar plate for proton exchange membrane fuel cells. *Int. J. Hydrogen Energy* **2009**, *34*, 405–409, doi:10.1016/j.ijhydene.2008.10.068.
  125. Bi, F.; Peng, L.; Yi, P.; Lai, X. Multilayered Zr-C/a-C film on stainless steel 316L as bipolar plates for proton exchange membrane fuel cells. *J. Power Sources* **2016**, *314*, 58–65, doi:10.1016/j.jpowsour.2016.02.078.
  126. Li, X.; Hou, K.; Qiu, D.; Yi, P.; Lai, X. A first principles and experimental study on the influence of nitrogen doping on the performance of amorphous carbon films for proton exchange membrane fuel cells. *Carbon* **2020**, *167*, 219–229, doi:10.1016/j.carbon.2020.05.082.
  127. Dong, H.; He, S.; Wang, X.; Zhang, C.; Sun, D. Study on conductivity and corrosion resistance of N-doped and Cr/N co-doped DLC films on bipolar plates for PEMFC. *Diam. Relat. Mater.* **2020**, *110*, 108156, doi:10.1016/j.diamond.2020.108156.
  128. Jiang, L.; Syed, J.A.; Gao, Y.; Zhang, Q.; Zhao, J.; Lu, H.; Meng, X. Electropolymerization of camphorsulfonic acid doped conductive polypyrrole anti-corrosive coating for 304SS bipolar plates. *Appl. Surf. Sci.* **2017**, *426*, 87–98, doi:10.1016/j.apsusc.2017.07.077.
  129. García, M.L.; Smit, M.A. Study of electrodeposited polypyrrole coatings for the corrosion protection of stainless steel bipolar plates for the PEM fuel cell. *J. Power Sources* **2006**, *158*, 397–402, doi:10.1016/j.jpowsour.2005.09.037.
  130. Shanmugham, C.; Rajendran, N. Corrosion resistance of poly p-phenylenediamine conducting polymer coated 316L SS bipolar plates for Proton Exchange Membrane Fuel Cells. *Prog. Org. Coatings* **2015**, *89*, 42–49, doi:10.1016/j.porgcoat.2015.07.023.
  131. Jiang, L.; Syed, J.A.; Lu, H.; Meng, X. In-situ electrodeposition of conductive polypyrrole-graphene oxide composite coating for corrosion protection of 304SS bipolar plates. *J. Alloy. Compd.* **2019**, *770*, 35–47, doi:10.1016/j.jallcom.2018.07.277.
  132. Jiang, L.; Syed, J.A.; Zhang, G.; Ma, Y.; Ma, J.; Lu, H.; Meng, X. Enhanced anticorrosion performance of PPY-graphene oxide/PPY-camphorsulfonic acid composite coating for 304SS bipolar plates in proton exchange membrane fuel cell. *J. Ind. Eng. Chem.* **2019**, *80*, 497–507, doi:10.1016/j.jiec.2019.08.032.
  133. Sharma, S.; Zhang, K.; Gupta, G., and Santamaria, D.G., Exploring PANI-TiN nanoparticle coatings in a PEFC environment: Enhancing corrosion resistance and conductivity of stainless steel bipolar plates. *Energies* **2017**, *10*, 1152–1152.
  134. Wang, Y.; Zhang, S.; Wang, P.; Lu, Z.; Chen, S., and Wang, L., Synthesis and corrosion protection of Nb doped TiO<sub>2</sub> na-nopowders modified polyaniline coating on 316 stainless steel bipolar plates for proton-exchange membrane fuel cells. *Prog. Org. Coat.* **2019**, *137*, 105327.
  135. Pan, T.; Zuo, X.; Wang, T.; Hu, J.; Chen, Z.; Ren, Y. Electrodeposited conductive polypyrrole/polyaniline composite film for the corrosion protection of copper bipolar plates in proton exchange membrane fuel cells. *J. Power Sources* **2016**, *302*, 180–188, doi:10.1016/j.jpowsour.2015.10.027.
  136. Akula, S.; Kalaiselvi, P.; Sahu, A.K.; Chellammal, S. Electrodeposition of conductive PAMT/PPY bilayer composite coatings on 316L stainless steel plate for PEMFC application. *Int. J. Hydrogen Energy* **2021**, *46*, 17909–17921, doi:10.1016/j.ijhydene.2021.02.196.
  137. Pan, T.; Chen, Y.; Zhang, B.; Hu, J.; Li, C. Corrosion behavior of niobium coated 304 stainless steel in acid solution. *Appl. Surf. Sci.* **2016**, *369*, 320–325, doi:10.1016/j.apsusc.2016.02.088.
  138. Mohammadi, N.; Yari, M., and Allahkaram, S.R., Characterization of PbO<sub>2</sub> coating electrodeposited onto stainless steel 316L substrate for using as PEMFC's bipolar plates. *Surf. Coat. Tech.* **2013**, *236*, 341–346.
  139. Wang, H.; Turner, J.A.; Li, X.; Teeter, G. Process modification for coating SnO<sub>2</sub>:F on stainless steels for PEM fuel cell bipolar plates. *J. Power Sources* **2008**, *178*, 238–247, doi:10.1016/j.jpowsour.2007.12.010.

- 
140. Manso, A.; Marzo, F.; Garicano, X.; Alegre, C.; Lozano, A.; Barreras, F. Corrosion behavior of tantalum coatings on AISI 316L stainless steel substrate for bipolar plates of PEM fuel cells. *Int. J. Hydrogen Energy* **2020**, *45*, 20679–20691, doi:10.1016/j.ijhydene.2019.12.157.
141. Wang, X.-Z.; Fan, H.-Q.; Muneshwar, T.; Cadien, K.; Luo, J.-L. Balancing the corrosion resistance and through-plane electrical conductivity of Cr coating via oxygen plasma treatment. *J. Mater. Sci. Technol.* **2021**, *61*, 75–84, doi:10.1016/j.jmst.2020.06.012.
142. Chanda, U.K.; Padhee, S.P.; Pandey, A.K.; Roy, S., and Pati, S., Electrodeposited Ni–Mo–Cr–P coatings for AISI 1020 steel bipolar plates. *Int. J. Hydrog. Energy* **2020**, *45*, 21892–21904.
143. He, R.; Jiang, J.; Wang, R.; Yue, Y.; Chen, Y.; Pan, T. Anti-corrosion and conductivity of titanium diboride coating on metallic bipolar plates. *Corros. Sci.* **2020**, *170*, 108646, doi:10.1016/j.corsci.2020.108646.
144. Jin, C.K.; Jeong, M.G., and Kang, C.G., Fabrication of titanium bipolar plates by rubber forming and performance of single cell using TiN-coated titanium bipolar plates. *Int. J. Hydrog. Energy* **2014**, *39*, 21480–21488.
145. El-Enin, S.A.A.; Abdel-Salam, O.E.; El-Abd, H.; Amin, A.M. New electroplated aluminum bipolar plate for PEM fuel cell. *J. Power Sources* **2008**, *177*, 131–136, doi:10.1016/j.jpowsour.2007.11.042.
146. Zhang, D.; Duan, L.; Guo, L.; Wang, Z.; Zhao, J.; Tuan, W.-H., and Niihara, K., TiN-coated titanium as the bipolar plate for PEMFC by multi-arc ion plating. *Int. J. Hydrog. Energy*, **2011**, *36*, 9155–9161.
147. Lee, K.H.; Jin, C.K.; Kang, C.G.; Seo, H.Y.; Kim, J.D. Fabrication of Titanium Bipolar Plates by Rubber Forming Process and Evaluation Characteristics of TiN coated Titanium Bipolar Plates. *Fuel Cells* **2014**, *15*, 170–177, doi:10.1002/fuce.201400091.
148. Bi, J.; Yang, J.; Liu, X.; Wang, D.; Yang, Z.; Liu, G.; Wang, X. Development and evaluation of nitride coated titanium bipolar plates for PEM fuel cells. *Int. J. Hydrogen Energy* **2021**, *46*, 1144–1154, doi:10.1016/j.ijhydene.2020.09.217.
149. Zhang, P.; Hao, C.; Han, Y.; Du, F.; Wang, H.; Wang, X.; Sun, J. Electrochemical behavior and surface conductivity of NbC modified Ti bipolar plate for proton exchange membrane fuel cell. *Surf. Coatings Technol.* **2020**, *397*, 126064, doi:10.1016/j.surfcoat.2020.126064.
150. Shi, J.; Zhang, P.; Han, Y.; Wang, H.; Wang, X.; Yu, Y.; Sun, J. Investigation on electrochemical behavior and surface conductivity of titanium carbide modified Ti bipolar plate of PEMFC. *Int. J. Hydrogen Energy* **2020**, *45*, 10050–10058, doi:10.1016/j.ijhydene.2020.01.203.
151. Jin, J.; He, Z.; Zhao, X. Formation of a protective TiN layer by liquid phase plasma electrolytic nitridation on Ti–6Al–4V bipolar plates for PEMFC. *Int. J. Hydrogen Energy* **2020**, *45*, 12489–12500, doi:10.1016/j.ijhydene.2020.02.152.
152. Peng, S.; Xu, J.; Li, Z.; Jiang, S.; Munroe, P.; Xie, Z.-H.; Lu, H. A reactive-sputter-deposited TiSiN nanocomposite coating for the protection of metallic bipolar plates in proton exchange membrane fuel cells. *Ceram. Int.* **2020**, *46*, 2743–2757, doi:10.1016/j.ceramint.2019.09.263.
153. Joseph, S.; McClure, J.; Sebastian, P.; Moreira, J.; Valenzuela, E. Polyaniline and polypyrrole coatings on aluminum for PEM fuel cell bipolar plates. *J. Power Sources* **2008**, *177*, 161–166, doi:10.1016/j.jpowsour.2007.09.113.
154. Lee, C.-H.; Lee, Y.-B.; Kim, K.-M.; Jeong, M.-G., and Lim, D.-S., Electrically conductive polymer composite coating on aluminum for PEM fuel cells bipolar plate. *Renew. Energy* **2013**, *54*, 46–50.
155. Mawdsley, J.R.; Carter, J.D.; Wang, X.; Niyogi, S.; Fan, C.Q.; Koc, R.; Osterhout, G. Composite-coated aluminum bipolar plates for PEM fuel cells. *J. Power Sources* **2013**, *231*, 106–112, doi:10.1016/j.jpowsour.2012.12.074.
156. Li, Z.; Feng, K.; Wang, Z.; Cai, X.; Yao, C.; Wu, Y. Investigation of single-layer and multilayer coatings for aluminum bipolar plate in polymer electrolyte membrane fuel cell. *Int. J. Hydrogen Energy* **2014**, *39*, 8421–8430, doi:10.1016/j.ijhydene.2014.03.136.
157. Silva, F.C.; Prada Ramirez, O.M.; Tunes, M.A.; Edmondson, P.D.; Sagás, J.C.; Fontana, L.C.; de Melo, H.G., and Schön, C.G., Corrosion resistance of functionally graded TiN/Ti coatings for proton exchange membrane fuel cells. *Int. J. Hydrog. Energy* **2020**, *45*, 33993–34010.
158. Chiang, T.-Y.; Ay, S.; Tsai, L.-C.; Sheu, H.-H., and Lu, C.-E., Corrosion resistance of 5052 Al-alloy with a zirconia-rich conversion coating used in bipolar plates in PEMFCs. *Int. J. Electrochem. Sci.*, **2014**, *9*(11): P. 5850–5863, 14 pp.
159. Hua, Q.; Zeng, Y.; He, Z.; Xu, Q.; Min, Y. Microstructure, synergistic mechanism and corrosion behavior of tin oxide conversion film modified by chitosan on aluminum alloy surface. *Colloid Interface Sci. Commun.* **2020**, *36*, 100262, doi:10.1016/j.colcom.2020.100262.

160. Fetohi, A.E.; Hameed, R.A.; El-Khatib, K. Development of electroless Ni-P modified aluminum substrates in a simulated fuel cell environment. *J. Ind. Eng. Chem.* **2015**, *30*, 239–248, doi:10.1016/j.jiec.2015.05.028.
161. Gutiérrez, A.G.G.; Pech-Canul, M.A.; Sebastian, P.J. Zincating Effect on Corrosion Resistance of Electroless Ni-P Coating on Aluminum Alloy 6061. *Fuel Cells* **2017**, *17*, 770–777, doi:10.1002/face.201600212.
162. Marzo, F.; Alberro, M.; Manso, A.; Garikano, X.; Alegre, C.; Montiel, M.; Lozano, A.; Barreras, F. Evaluation of the corrosion resistance of Ni(P)Cr coatings for bipolar plates by electrochemical impedance spectroscopy. *Int. J. Hydrogen Energy* **2020**, *45*, 20632–20646, doi:10.1016/j.ijhydene.2020.03.076.
163. Nikiforov, A.; Petrushina, I.; Christensen, E.; Tomás-García, A.; Bjerrum, N. Corrosion behaviour of construction materials for high temperature steam electrolyzers. *Int. J. Hydrogen Energy* **2011**, *36*, 111–119, doi:10.1016/j.ijhydene.2010.09.023.
164. Ghorbani, M.M.; Taherian, R., and Bozorg, M., Investigation on physical and electrochemical properties of TiN-coated Monel alloy used for bipolar plates of proton exchange membrane fuel cell. *Mater. Chem. Phys.* **2019**, *238*, 121916.
165. Ben Jadi, S.; El Jaouhari, A.; Aouzal, Z.; El Guerra, A.; Bouabdallaoui, M.; Wang, R.; Bazzouai, E.A., and Bazzouai, M., Elec-tropolymerization and corrosion resistance of polypyrrole on nickel bipolar plate for PEM fuel cell application. *Mater. Today* **2020**, *22*, 52–56.
166. Park, J.; Kusumah, P.; Kim, Y.; Kim, K.; Kwon, K., and Lee, C.K., Corrosion Prevention of Chromium Nitride Coating with an Application to Bipolar Plate Materials. *Electrochemistry* **2014**, 658–662.
167. Park, J.; Dilasari, B.; Kim, Y.; Kim, K.; Lee, C.K.; Kwon, K. Passivation Behavior and Surface Resistance of Electrodeposited Nickel-Carbon Composites. *Electrochem.* **2014**, *82*, 561–565, doi:10.5796/electrochemistry.82.561.
168. Thalmaier, G.; Vida-Simiti, I.; Vermesan, H.; Codrean, C.; Chira, M. Corrosion Resistance Measurements of Amorphous Ni<sub>40</sub>Ti<sub>40</sub>Nb<sub>20</sub> Bipolar Plate Material for Polymer Electrolyte Membrane Fuel Cells. *Adv. Eng. Forum* **2013**, *8-9*, 335–342, doi:10.4028/www.scientific.net/aef.8-9.335.
169. Yokoyama, M.; Yamaura, S.-I.; Kimura, H.; Inoue, A. Production of metallic glassy bipolar plates for PEM fuel cells by hot pressing in the supercooled liquid state. *Int. J. Hydrogen Energy* **2008**, *33*, 5678–5685, doi:10.1016/j.ijhydene.2008.07.034.
170. Tian, R.; Qin, Z. Bulk metallic glass Zr<sub>55</sub>Cu<sub>30</sub>Al<sub>10</sub>Ni<sub>5</sub> bipolar plates for proton exchange membrane fuel cell. *Energy Convers. Manag.* **2014**, *86*, 927–932, doi:10.1016/j.enconman.2014.06.035.
171. Lv, J.; Tongxiang, L.; Chen, W. The effects of molybdenum and reduced graphene oxide on corrosion resistance of amorphous nickel–phosphorus as bipolar plates in PEMFC environment. *Int. J. Hydrogen Energy* **2016**, *41*, 9738–9745, doi:10.1016/j.ijhydene.2016.03.104.
172. Han, X.; Feng, S.; Chen, S.; Cao, Q.; Zhang, C.; Chen, Q. An investigation of Zr-based bulk metallic glasses as bipolar plates for proton exchange membrane fuel cells. *Int. J. Hydrogen Energy* **2020**, *45*, 3132–3144, doi:10.1016/j.ijhydene.2019.11.174.
173. Nikam, V.V.; Reddy, R.G. Corrosion studies of a copper–beryllium alloy in a simulated polymer electrolyte membrane fuel cell environment. *J. Power Sources* **2005**, *152*, 146–155, doi:10.1016/j.jpowsour.2005.02.035.
174. Lee, H.-Y.; Lee, S.-H.; Kim, J.-H.; Kim, M.-C.; Wee, D.-M. Thermally nitrated Cu–5.3Cr alloy for application as metallic separators in PEMFCs. *Int. J. Hydrogen Energy* **2008**, *33*, 4171–4177, doi:10.1016/j.ijhydene.2008.04.057.
175. Lee, Y.H.; Noh, S.; Lee, J.-H.; Chun, S.-H.; Cha, S.W.; Chang, I. Durable graphene-coated bipolar plates for polymer electrolyte fuel cells. *Int. J. Hydrogen Energy* **2017**, *42*, 27350–27353, doi:10.1016/j.ijhydene.2017.09.053.
176. Sadeghian, Z.; Hadidi, M.R.; Salehzadeh, D., and Nemati, A., Hydrophobic octadecylamine-functionalized graphene/TiO<sub>2</sub> hybrid coating for corrosion protection of copper bipolar plates in simulated proton exchange membrane fuel cell environment. *Int. J. Hydrog. Energy* **2020**, *45*, 15380–15389.
177. Altun, H.; Sen, S. The effect of PVD coatings on the corrosion behaviour of AZ91 magnesium alloy. *Mater. Des.* **2006**, *27*, 1174–1179, doi:10.1016/j.matdes.2005.02.004.
178. Wu, G.; Zeng, X.; Ding, W.; Guo, X.; Yao, S. Characterization of ceramic PVD thin films on AZ31 magnesium alloys. *Appl. Surf. Sci.* **2006**, *252*, 7422–7429, doi:10.1016/j.apsusc.2005.08.095.
179. Hollstein, F.; Wiedemann, R.; Scholz, J. Characteristics of PVD-coatings on AZ31hp magnesium alloys. *Surf. Coatings Technol.* **2003**, *162*, 261–268, doi:10.1016/s0257-8972(02)00671-0.
180. Mao, Y.; Li, Z.; Feng, K.; Guo, X.; Zhou, Z.; Dong, J.; Wu, Y. Preparation, characterization and wear behavior of carbon coated magnesium alloy with electroless plating nickel interlayer. *Appl. Surf. Sci.* **2015**, *327*, 100–106, doi:10.1016/j.apsusc.2014.11.151.



- 
181. Yan, P.; Ying, T.; Li, Y.; Li, D.; Cao, F.; Zeng, X.; Ding, W. A novel high corrosion-resistant polytetrafluoroethylene/carbon cloth/Ag coating on magnesium alloys as bipolar plates for light-weight proton exchange membrane fuel cells. *J. Power Sources* **2021**, *484*, 229231, doi:10.1016/j.jpowsour.2020.229231.
  182. Yang, Y.; Guo, L.-J.; Liu, H. Corrosion characteristics of SS316L as bipolar plate material in PEMFC cathode environments with different acidities. *Int. J. Hydrogen Energy* **2011**, *36*, 1654–1663, doi:10.1016/j.ijhydene.2010.10.067.
  183. Nikam, V.V.; Reddy, R.G.; Collins, S.R.; Williams, P.C.; Schiroky, G.H.; Henrich, G.W. Corrosion resistant low temperature carburized SS 316 as bipolar plate material for PEMFC application. *Electrochimica Acta* **2008**, *53*, 2743–2750, doi:10.1016/j.electacta.2007.10.061.
  184. Jung, G.-B.; Chuang, K.-Y.; Jao, T.-C.; Yeh, C.-C.; Lin, C.-Y. Study of high voltage applied to the membrane electrode assemblies of proton exchange membrane fuel cells as an accelerated degradation technique. *Appl. Energy* **2012**, *100*, 81–86, doi:10.1016/j.apenergy.2012.06.046.
  185. Papadimas, D.D.; Ahluwalia, R.K.; Thomson, J.K.; Meyer, H.M.; Brady, M.P.; Wang, H.; Turner, J.A.; Mukundan, R.; Borup, R. Degradation of SS316L bipolar plates in simulated fuel cell environment: Corrosion rate, barrier film formation kinetics and contact resistance. *J. Power Sources* **2015**, *273*, 1237–1249, doi:10.1016/j.jpowsour.2014.02.053.
  186. Le Bozec, N.; Compère, C.; L’Her, M.; Laouenan, A.; Costa, D.; Marcus, P. Influence of stainless steel surface treatment on the oxygen reduction reaction in seawater. *Corros. Sci.* **2001**, *43*, 765–786, doi:10.1016/s0010-938x(00)00113-x.
  187. Park, Y.-C.; Lee, S.-H.; Kim, S.-K.; Lim, S.; Jung, D.-H.; Lee, D.-Y.; Choi, S.-Y.; Ji, H.; Peck, D.-H. Performance and long-term stability of Ti metal and stainless steels as a metal bipolar plate for a direct methanol fuel cell. *Int. J. Hydrogen Energy* **2010**, *35*, 4320–4328, doi:10.1016/j.ijhydene.2010.02.010.
  188. Alishahi, M.; Mahboubi, F.; Khoie, S.M.; Aparicio, M.; Hübner, R.; Soldera, F.; Gago, R. Electrochemical behavior of nanocrystalline Ta/TaN multilayer on 316L stainless steel: Novel bipolar plates for proton exchange membrane fuel-cells. *J. Power Sources* **2016**, *322*, 1–9, doi:10.1016/j.jpowsour.2016.04.133.
  189. Lee, S.; Woo, S.; Kakati, N.; Lee, Y.; Yoon, Y. Corrosion and electrical properties of carbon/ceramic multilayer coated on stainless steel bipolar plates. *Surf. Coatings Technol.* **2016**, *303*, 162–169, doi:10.1016/j.surfcoat.2016.03.072.
  190. Mathabatha, M.; Popoola, A.; Oladijo, O. Residual stresses and corrosion performance of plasma sprayed zinc-based alloy coating on mild steel substrate. *Surf. Coatings Technol.* **2017**, *318*, 293–298, doi:10.1016/j.surfcoat.2016.10.023.
